1 Article

2

3 **Conformational Flexibility and Local Frustration in**  
4 **the Functional States of the SARS-CoV-2 Spike**  
5 **B.1.1.7 and B.1.351 Variants : Mutation-Induced**  
6 **Allosteric Modulation Mechanism of Functional**  
7 **Dynamics and Protein Stability**

8

9 Gennady Verkhivker<sup>1,2\*</sup>

10

11 <sup>1</sup> Keck Center for Science and Engineering, Graduate Program in Computational and Data Sciences, Schmid  
12 College of Science and Technology, Chapman University, Orange, CA 92866, United States of America

13 <sup>2</sup> Department of Biomedical and Pharmaceutical Sciences, Chapman University School of Pharmacy, Irvine,  
14 CA 92618, United States of America

15

16 \* Correspondence: verkhivk@chapman.edu; Tel.: +1-714-516-4586 (G.V)

17

Received: date; Accepted: date; Published: date

18 **Abstract:** The experimental and computational studies of the SARS-CoV-2 spike protein variants  
19 revealed an important role of the D614G mutation that is shared across variants of  
20 concern (VOCs), linking the effect of this mutation with the enhanced virus infectivity and  
21 transmissibility. The recent structural and biophysical studies characterized the closed and open  
22 states of the B.1.1.7 (B.1.1.7) and B.1.351 (Beta) spike variants allowing for a more detailed atomistic  
23 characterization of the conformational landscapes and functional changes. In this study, we  
24 employed coarse-grained simulations of the SARS-CoV-2 spike variant trimers together  
25 with the ensemble-based mutational frustration analysis to characterize the dynamics  
26 signatures of the conformational landscapes. By combining the local frustration analysis of the  
27 conformational ensembles with collective dynamics and residue-based mutational scanning of  
28 protein stability, we determine protein stability hotspots and identify potential energetic drivers  
29 favoring the receptor-accessible open spike states for the B.1.1.7 and B.1.351 spike variants.  
30 Through mutational scanning of protein stability changes we quantify mutational adaptability  
31 of the S-G614, S-B.1.1.7 and S-B.1.351 variants in different functional forms. Using this analysis,  
32 we found a significant conformational and mutational plasticity of the open states for all studied  
33 variants. The results of this study suggest that modulation of the energetic frustration at the  
34 inter-protomer interfaces can serve as a mechanism for allosteric couplings between  
35 mutational sites, the inter-protomer hinges of functional motions and motions of the  
36 receptor-binding domain required for binding of the host cell receptor. The proposed mechanism  
37 of mutation-induced energetic frustration may result in the greater adaptability and the  
38 emergence of multiple conformational substates in the open form. This study also suggested  
39 functional relationships between mutation-induced modulation of protein dynamics, local  
40 frustration and allosteric regulation of the SARS-CoV-2 spike protein.

41

**Keywords:** SARS-CoV-2 spike protein, ACE2 host receptor, mutational variants, conformational  
42 dynamics, local frustration, mutational scanning protein stability, allosteric interactions

## 43 1. Introduction

44

45 SARS-CoV-2 infection is transmitted when the viral spike (S) glycoprotein binds to the host cell  
46 receptor ACE2, leading to the entry of S protein into host cells and membrane fusion [1,2]. The  
47 full-length SARS-CoV-2 S protein consists of amino (N)-terminal S1 subunit and carboxyl  
48 (C)-terminal S2 subunit where S1 is involved in the interactions with the host receptor and  
49 includes an N-terminal domain (NTD), the receptor-binding domain (RBD), and two structurally  
50 conserved subdomains (SD1 and SD2). Structural and biochemical studies established that the  
51 mechanism of virus infection may involve conformational transitions between distinct  
52 functional forms of the SARS-CoV-2 S protein in which the RBDs continuously switch  
53 between “down” and “up” positions [3-10]. The cryo-EM structure of the SARS-CoV-2 S  
54 trimer revealed a spectrum of closed states that included a structurally rigid closed form and  
55 more dynamic closed states preceding a transition to the fully open S conformation [5]. Protein  
56 engineering and structural studies also showed that specific disulfide bonds and proline  
57 mutations can modulate stability of the SARS-CoV-2 S trimer [6] and lead to the  
58 thermodynamic shifts between the closed and open forms [7-9]. Dynamic structural changes  
59 that accompany SARS-CoV-2 S binding with the ACE2 host receptor were described in cryo-EM  
60 experiments showing a cascade of conformational transitions from a compact closed form  
61 weakened after furin cleavage to the partially open states and subsequently the ACE2-bound  
62 open form thus priming the S protein for fusion [10]. The cryo-EM and tomography examined  
63 conformational flexibility and distribution of S trimers in situ on the virion surface [11] showing  
64 that spontaneous conformational changes and population shifts between different functional states  
65 can be maintained in different biological environments, reflecting the intrinsic properties of  
66 conformational landscapes for SARS-CoV-2 S trimers. Single-molecule Fluorescence (Förster)  
67 Resonance Energy Transfer (smFRET) studies of SARS-CoV-2 S trimer on virus particles  
68 revealed a sequence of conformational transitions from the closed state to the receptor-bound  
69 open state suggesting that mechanisms of conformational selection and receptor-induced structural  
70 adaptation can work synchronously and showing that SARS-CoV-2 neutralization can be achieved  
71 by antibodies that either directly compete with the ACE2 receptor binding or exert their effect by  
72 allosterically stabilizing the S protein in its RBD-down conformation [12]. The expanding body  
73 of structural and biochemical studies of the SARS-CoV-2 S complexes with different classes of  
74 potent antibodies targeting distinct binding epitopes of the S-RBD as well as various antibody  
75 cocktails and combinations have revealed multiple conformation-dependent epitopes, highlighting  
76 the link between conformational plasticity and adaptability of S proteins and capacity for eliciting  
77 specific binding and broad neutralization responses [13-36]. Deep mutagenesis scanning of  
78 antibody-escaping mutations showed that the escape mutations cluster in several RBD regions  
79 and can be constrained with respect to their effects on expression of properly folded RBD and  
80 ACE2 binding [37-42]. SARS-CoV-2 S mutants with the enhanced infectivity profile including  
81 D614G mutational variant have attracted an enormous attention in the scientific community  
82 following the evidence of the mutation enrichment via epidemiological surveillance, resulting in  
83 proliferation of experimental data and a considerable variety of the proposed mechanisms  
84 explaining functional observations [43-45]. The latest biochemical studies provided evidence of a  
85 phenotypic advantage and the enhanced infectivity conferred by the D614G mutation [46]. The  
86 initial structural studies showed that the D614G mutation can act by shifting the population of  
87 the SARS-CoV-2 S trimer from the closed form (53% of the equilibrium) in the native spike  
88 protein to a widely-open topology of the “up” protomers in the D614G mutant with 36% of  
89 the population adopting a single open protomer, 39% with two open protomers and 20%  
90 with all three protomers in the open conformation [47]. The cryo-EM structures of the S-D614 and  
91 S-G614 ectodomains showed the increased population of the 1-RBD-up open form as compared  
92 to the closed state in the S-GSAS/D614G structure [48]. The electron microscopy analysis also  
93 revealed the higher 84% percentage of the 1-up RBD conformation in the S-G614 protein [49].  
94 Functional studies showed that the S-G614 mutant exhibited the greater infectivity than the

95 S-D614 protein which was attributed to the greater stability of the S-G614 mutant and leading  
96 to the reduced S1 subdomain shedding [50]. The increased stability of the D614G mutant  
97 was inferred from the recent cryo-EM structures of a full-length unmodified S-G614 trimer that  
98 can reversibly adopt an all-down closed state and 1 RBD-up open conformation [51].  
99

100 B.1.1.7 variant of the SARS-CoV-2, a descendant of the D614G lineage, has originated in UK and  
101 spread to 62 countries showing the increased transmissibility. 8 of the 17 mutations observed  
102 in this variant ( $\Delta 69-70$  deletion,  $\Delta 144$  deletion, N501Y, A570D, P681H, T716I, S982A, D1118H) are  
103 accumulated in the S protein, featuring most prominently N501Y mutation that can increase  
104 binding affinity with ACE2 while eliciting immune escape and reduced neutralization of  
105 RBD-targeting antibodies [52-54]. SARS-CoV-2-S pseudo-viruses bearing either the reference strain  
106 or the B.1.1.7 lineage spike protein with sera of 40 participants who were vaccinated with the  
107 mRNA-based vaccine BNT162b2 showed largely preserved neutralization, indicating that the  
108 B.1.1.7 lineage will not escape BNT162b2-mediated protection [55]. SARS-CoV-2 B.1.351 variant  
109 was first detected in South Africa is characterized by 21 mutations with nine mutations (L18F,  
110 D80A, D215G, R246I, K417N, E484K, N501Y, D614G, and A701V) in the spike protein, of which three  
111 mutations (K417N, E484K, and N501Y) are located in the RBD and increase the binding affinity for  
112 the ACE receptors and induce significant immune escape [56,57]. The recent data demonstrate  
113 reduced but still significant neutralization against the full B.1.351 variant following mRNA-1273  
114 vaccination [58]. Functional and structural studies explored how B.1.1.7 (B.1.1.7), B.1.351 (beta),  
115 P1 (gamma) and B.1.1.427/B.1.429 (epsilon) variants in the SARS-CoV-2 S protein affect  
116 conformational landscapes of the S protein and the ability to evade host immunity and incur  
117 resistance to antibodies [59-69]. These studies revealed subtle structural and functional impact  
118 of mutations that can modulate dynamics and stability of the closed and open forms, increase  
119 binding to the human receptor ACE2, and confer resistance to neutralizing antibodies. Structural  
120 determination of the SARS-CoV-2 S S-B.1.1.7 trimer showed preferences for the RBD-up  
121 conformation. The FPPR (residues 828 to 853) and 630 loop (residues 620 to 640) modulate the  
122 stability and structural rearrangements of the S protein [70]. Based on structural evidence, it was  
123 proposed that B.1.1.7 mutations A570D and S982A can induce global movement of the CTD1,  
124 thereby relaxing the FPPR and 630 loop, which may increase the frequency with which the S  
125 trimer samples the RBD-up conformation. The overall structures of the S-B.1.351 and S-G614  
126 trimers were similar for the corresponding states, with mutations K417N, E484K, and N501Y  
127 resulting in only minor structural rearrangements [70]. The cryo-EM structures of the S protein  
128 of B.1.1.7 variant identified four distinct conformational states with three of the conformational  
129 classes corresponded to a 1 RBD-up and one to 2 RBD-up conformation [71]. This study indicated that  
130 B.1.1.7 mutations can modulate dynamics of the open S conformations without introducing substantial  
131 structural changes as compared to the S-G614 structures. Importantly, it was proposed that A570D can  
132 serve as a molecular switch that could modulate the opening and closing of the RBD [71]. In this  
133 mechanism, the switching of the A570D-mediated salt bridges may serve as a pedal-bin-like  
134 device to modulate the RBD motion. A total of 38 cryo-EM structures of the S-B.1.351, S-P.1  
135 (Gamma), S-B.1.617.2 (Delta) and S-B.1.617.1 (Kappa) variants in different functional states with and  
136 without its receptor ACE2 have been recently reported showing a diverse and vast  
137 conformational landscape for each of the variants [72]. The structures of these S variants confirmed  
138 the broad spectrum of intrinsic RBD-up propensities that are inherently present in the apo states,  
139 with different numbers of RBD-up and multiple substates. In particular, S-B.1.351 variant  
140 displayed a highly populated fully open state with all three RBDs in the up conformation in  
141 addition to significant fractions of the partially open states (1 RBD-up or 2 RBD-up) [72].  
142 Importantly, among all the S variants only S-B.1.351 exhibited a fully open 3 RBD-up  
143 conformation that was not observed in related structural studies [63,70,71] and that resembles  
144 structure of the fully open S-G614 variant [47]. These structural studies suggested that the increased  
145 conformational diversity and particularly greater variability of the open states can allow S-Beta,  
146 S-Gamma and S-Delta variants to adapt their responses and provide mechanisms for escape  
147 immunity from common vaccines and different classes of monoclonal antibodies. Biophysical

148 studies using microscale thermophoresis established that SARS-CoV-2 B.1.1.7 and B.1.351 spike  
149 variants bind human ACE2 with increased affinity [73]. According to this study, the enhanced  
150 affinity can mediate increased infectivity by lowering the effective concentration of virions  
151 required for cell entry which would result in highly transmissible SARS-CoV-2 variants. Using  
152 surface plasmon resonance (SPR), the effects of individual RBD mutations and combinations  
153 found in S-Alpha, S-Beta and S-Gamma variants on thermodynamics and kinetics of ACE2 binding  
154 [74]. It was found that most of these mutations increased the affinity of the RBD/ACE2 interaction  
155 with the exception of K417N/T which decreased the affinity. Collectively, the body of structural and  
156 biochemical studies revealing the emerging conformational plasticity of the S variants suggested  
157 that coronaviruses have broad potential to tolerate both sequence and structure changes without  
158 substantial loss of function [75]. The detection of common mutational changes D614G, E484K,  
159 N501Y and K417N shared among major circulating variants B.1.1.7, B.1.351, and P.1 also  
160 suggested that some positions may be critical for modulation of S protein responses and inducing  
161 immunity escape from vaccines and different classes of monoclonal antibodies [76-79]. Together,  
162 these studies unveiled a complex balance among mutational variants in which individual  
163 modifications may act cooperatively and synergistically to enhance stability, modulate binding to  
164 the ACE2, and confer immunity resistance to neutralizing antibodies [80].  
165 Computer simulations and protein modeling played an important role in shaping up our  
166 understanding of the dynamics and function of SARS-CoV-2 glycoproteins [81-91]. All-atom  
167 MD simulations of the full-length SARS-CoV-2 S glycoprotein embedded in the viral membrane,  
168 with a complete glycosylation profile were reported in an illuminating and insightful study by  
169 Amaro and coworkers providing the unprecedented level of details about the conformational  
170 landscapes and dynamics of S proteins in physiological environment [84]. Coarse-grained  
171 modeling of the SARS-CoV-2 virion combined results from cryo-EM and x-ray crystallography  
172 experiments together with computational predictions to build robust structural models of the  
173 SARS-CoV-2 proteins assemble a complete virion model [85]. More recent extensive MD  
174 simulations and free energy landscape mapping studies of the SARS-CoV-2 S proteins and mutants  
175 detailed conformational changes and diversity of ensembles, further supporting the notion of  
176 enhanced functional and structural plasticity of S proteins [92-97]. Our recent studies combined  
177 coarse-grained and atomistic MD simulations with coevolutionary analysis and network  
178 modeling to present evidence that the SARS-CoV-2 spike protein function as allosterically  
179 regulated machine that exploits plasticity of allosteric hotspots to fine-tune response to  
180 antibody binding [98-103]. These studies showed that examining allosteric behavior of the  
181 SARS-CoV-2 spike proteins may be useful to uncover functional mechanisms and rationalize the  
182 growing body of diverse experimental data. In particular, using atomistic-based view of allosteric  
183 communications in the SARS-CoV-2 S proteins we determined that the D614G mutation can exert  
184 its effect through allosterically induced changes on stability and communications in the residue  
185 interaction networks [104,105]. A review of computational simulation studies of the SARS-CoV-2 S  
186 proteins highlighted the synergies between experiments and simulations, outlining directions for  
187 computational biology research in understanding mechanisms of COVID-19 protein targets [106].  
188 In this study, we employed coarse-grained (CG) simulations of closed and open states of the  
189 S-G614, S-B.1.1.7 and S-B.1.351 trimers to characterize dynamic differences in the conformational  
190 landscapes. By combining atomistic dynamic analysis with the ensemble-based local frustration  
191 analysis of the conformational states, we characterize conformational plasticity of the S variants.  
192 Through mutational scanning of protein stability changes in the conformational states, we  
193 quantify mutational adaptability of the S-G614, S-B.1.1.7 and S-B.1.351 states. The ensemble-based  
194 dynamics and energetic analysis suggests a significant conformational and mutational plasticity of  
195 the open S states for all variants. This study suggests that modulation of the energetic  
196 frustration at the inter-protomer interfaces by mutations D614G, A570D, S982A can serve as a  
197 mechanism for allosteric regulation in which the dynamic couplings between the site of  
198 mutation and the inter-protomer hinge of functional motions would modulate the inter-domain  
199 interactions, global changes in mobility and the increased stability of the open form.

## 200 2. Results and Discussion

201

### 202 2.1. Atomistic Modeling and Simulations Reveal Distinct Conformational Flexibility Patterns of the 203 SARS-CoV-2 S Mutant Variants

204

205 We employed multiple CG simulations to provide a comparative analysis of the dynamic  
206 landscapes characteristic of the major functional states of the SARS-CoV-2 S trimer. While all-atom  
207 MD simulations with the explicit inclusion of the glycosylation shield could provide a rigorous  
208 assessment of conformational landscape of the SARS-CoV-2 S proteins, such direct simulations  
209 remain to be technically challenging due to the size of a complete SARS-CoV-2 S system  
210 embedded onto the membrane. We combined CG simulations with atomistic reconstruction and  
211 additional optimization by adding the glycosylated microenvironment. These cryo-EM structures  
212 of the S-G614 structures revealed structurally ordered 630 loop (residues 617 to 644) and FPPR  
213 region (residues 823 to 862) in the closed form [51] (Figure 1A,B). For the S-B.1.1.7 structures, the  
214 630 loop is disordered in the up protomer but ordered for the down-protomer on the opposite side  
215 [61] (Figure 1C,D). The closed and open forms of the S-B.1.351 trimer are very similar to the S-G614  
216 trimer structures [61]. Common to these structures, the all 630 loop and FPPR segment are ordered in  
217 the RBD-down form, while only FPPR and 630-loop are disordered in the 1-up protomer of the open  
218 state (Figure 1E,F). In the closed states, the NTD regions, RBD and CTD1 (residues 528-591) residues  
219 linking S1 and S2 subunits showed the increased mobility level. A comparative analysis of the  
220 dynamics profiles showed important differences in conformational flexibility of the S-B.1.1.7 and  
221 S-B.1.351 variant trimers in the closed states despite seemingly very similar structural organization  
222 and topology (Figure 2A). Notably, both S-B.1.1.7 and S-B.1.351 variants share D614G substitution.  
223 The dynamics profiles suggested that other mutations in S-B.1.1.7 and S-B.1.351 may further  
224 amplify the destabilizing effect of the D614G on the stability of the closed state (Figure 2A).

225

226

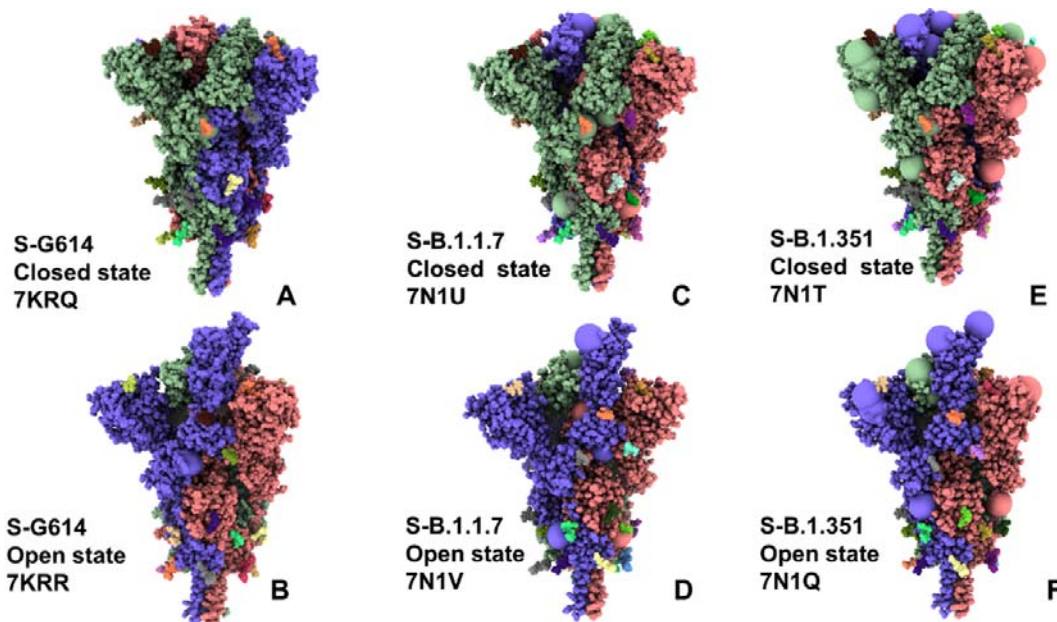

228 **Figure 1.** Cryo-EM structures of the SARS-CoV-2 S trimer structures used in this study. The  
229 S-G614 closed state (pdb id 7KRQ) (A) and 1 RBD-up open form (pdb id 7KRR) (B). The  
230 SARS-CoV-2 S-B.1.1.7 closed form (pdb id 7N1U) (C) and 1 RBD-up open state (pdb id 7N1V) (D).  
231 The SARS-CoV-2 S-B.1.351 closed form (pdb id 7N1T) (E) and 1 RBD-up open state (pdb id 7N1Q)  
232 (F). The structures are shown in full spheres and colored with protomers A,B,C are colored in green,  
233 red and blue. The rendering of SARS-CoV-2 S structures was done using the interactive  
234 visualization program UCSF ChimeraX [107].

235  
236  
237  
238  
239  
240  
241  
242  
243

Interestingly, the conformational fluctuations particularly increased in the S-B.1.351 closed structure, suggesting that mutations of this variant could induce further plasticity of the closed form and facilitate transitions to the partially open form (Figure 2A). The RMSF profiles for the 1 RBD-up open states were similar for S-G614 and S-B.1.1.7 conformations, while larger fluctuations were observed in the S-B.1.351 structure (Figure 2B). Together, these findings suggested the greater variability in the functional states of the S-B.1.351 trimer.

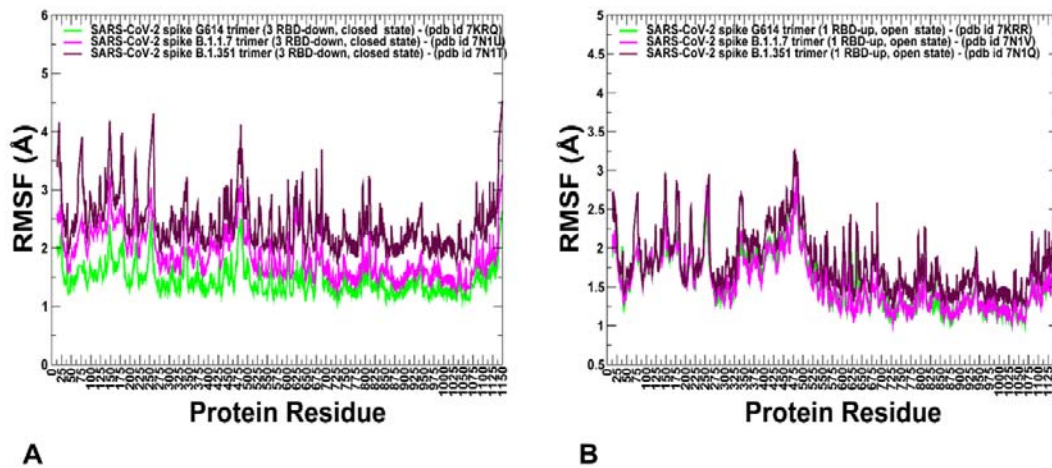

244  
245  
246  
247  
248  
249  
250  
251  
252  
253  
254  
255  
256

**Figure 2.** CG conformational dynamics profiles of the SARS-CoV-2 S protein variants. (A) The root mean square fluctuations (RMSF) profiles obtained from simulations of the cryo-EM structures of SARS-CoV-2 S-G614 in the closed state, pdb id 7KRQ (green lines), S-B.1.1.7 closed form, pdb id 7N1U (blue lines), and S-B.1.351 closed state, pdb id 7N1T (maroon lines). (B) The root mean square fluctuations (RMSF) profiles obtained from simulations of the cryo-EM structures of SARS-CoV-2 S-G614 in the open 1 RBD-up state, pdb id 7KRR (green lines), S-B.1.1.7 open 1 RBD-up form, pdb id 7N1V (blue lines), and S-B.1.351 open 1 RBD-up state, pdb id 7N1Q (maroon lines). The S1 regions include NTD (residues 14-306), RBD (residues 331-528), CTD1 (residues 528-591), CTD2 (residues 592-686), UH (residues 736-781), HR1 (residues 910-985), CH (residues 986-1035), CD (residues 1035-1068), HR2 (residues 1069-1163).

257  
258  
259  
260  
261  
262  
263  
264  
265  
266  
267  
268  
269

Structural maps of the conformational dynamics profiles illustrated the increased mobility of the closed states for the S-G614, S-B.1.1.7 and S-B.1.351 variant trimers while showing moderate flexibility of the open states (Figure 3). Of particular notice is a significant softening of the closed S-G614 and S-B.1.351 conformations. In these closed states, we detected the increased fluctuations in both S1 and S2 subunits (Figure 3 A,E). For the S-B.1.1.7 closed trimer, the fluctuations of the S2 regions were smaller and more significant flexibility was observed for the NTD regions (Figure 3C). These results suggested that the increased preferences of the S protein variants towards 1 RBD-up open conformation may be determined by the increased mobility the RBD-down closed forms. One of the key observations of the conformational dynamics analysis is the stabilization pattern in the open forms of the S protein variants (Figure 3B,D,F). In particular, we found that S-G614 and S-B.1.1.7 conformations displayed a broad stabilization in the S1 and S2 subunits but pointed to plasticity at the inter-protomer interfaces particularly near D614G site. The conformational variability in the NTD/RBD regions progressively increased in the open states from S-G614 (Figure



270 3B) to S-B.1.1.7 (Figure 3D) and S-B.1.351 variants (Figure 3F). Structural mapping of the  
271 conformational dynamics profiles also highlighted the increased flexibility at the S1/S2 interfaces  
272 and near inter-protomer hinges which may promote RBD movements in the up conformations for  
273 the S-B.1.1.7 and S-B.1.351 variants. These dynamic signatures of the S protein variants may  
274 imply the greater diversity of the RBD-up conformations. Interestingly, the observed plasticity of  
275 the open conformations in the S-B.1.351 variants may reflect structural heterogeneity of the  
276 RBD-up conformations revealed in cryo-EM studies [72] where the fully open state coexist with  
277 multiple substates of 1 RBD-up and 2 RBD-up conformations. Hence, our findings are consistent  
278 with the experimental studies indicating that the greater variability of the open states can allow  
279 S-B.1.351 variant to adapt RBD-up conformational responses and provide mechanisms for escape  
280 immunity from monoclonal antibodies  
281

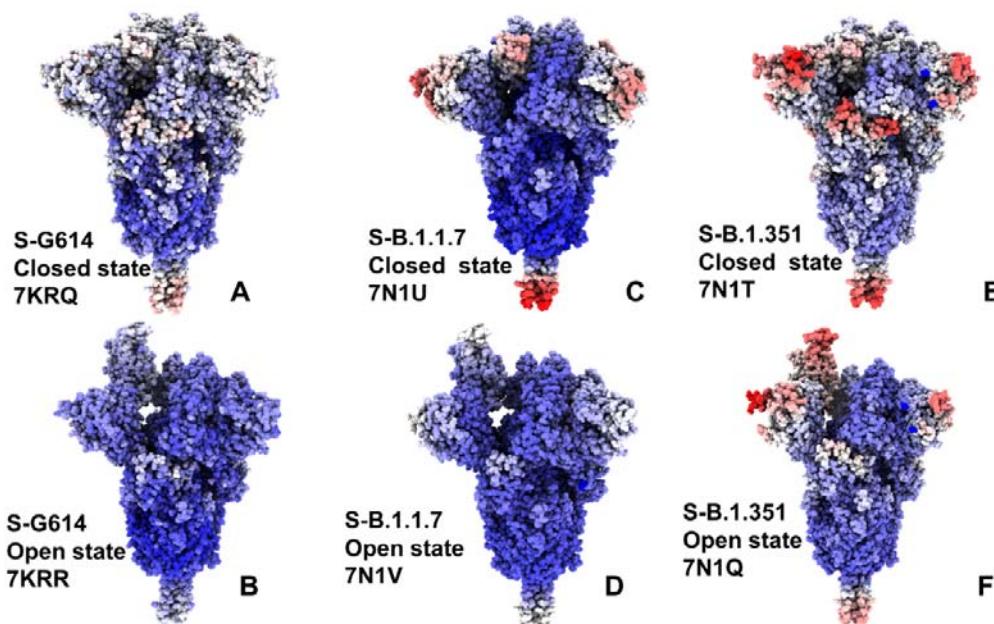

284 **Figure 3.** Structural maps of the conformational mobility profiles for the SARS-CoV-2 S protein  
285 variants. The dynamics map for S-G614 closed state (pdb id 7KRQ) (A) and 1 RBD-up open form  
286 (pdb id 7KRR) (B). Structural maps of the conformational mobility profiles for SARS-CoV-2  
287 S-B.1.1.7 closed form (pdb id 7N1U) (C) and 1 RBD-up open state (pdb id 7N1V) (D). Structural  
288 maps of the conformational mobility profiles for SARS-CoV-2 S-B.1.351 closed form (pdb id 7N1T)  
289 (E) and 1 RBD-up open state (pdb id 7N1Q) (F). The structures are in sphere-based  
290 representation rendered using UCSF ChimeraX [107] with the rigidity-to-flexibility sliding scale  
291 colored from blue to red.

295 We also monitored relative solvent accessibility of S protein residues that was averaged over  
296 simulation trajectories (Figure 4). For the closed S-G614 ensemble, only E484 residue is  
297 solvent-exposed, while K417 and N501 are partially buried (Figure 4A). The important functional  
298 position A570 is completely buried but G614 remains only partly insulated, reflecting some  
299 plasticity at the inter-protomer interfaces near mutational site (Figure 4A). In the open S-G614  
300 ensemble, functional residues K417, E484, N501 and G614 become moderately accessible to solvent,  
301 and only A570 position remains buried (Figure 4B). These observations reflect conformational  
302 flexibility of the RBD-up protomers and widening of the inter-protomer interfaces near G614.  
303

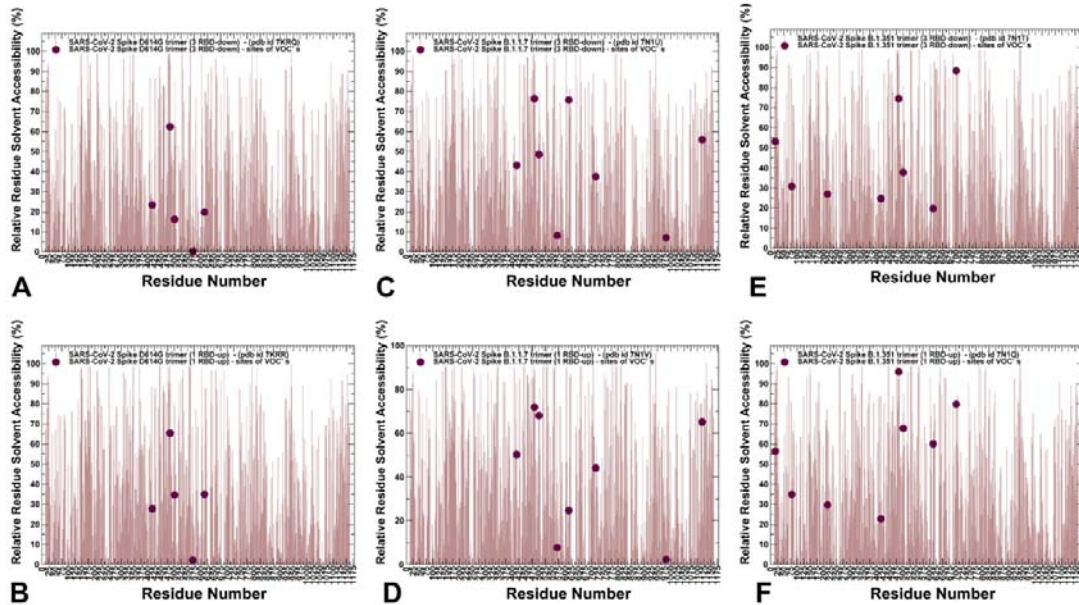

304  
305  
306  
307  
308  
309  
310  
311  
312  
313  
314  
315  
316  
317

**Figure 4.** The relative residue-based solvent accessibility profiles for the SARS-CoV-2 S protein variants averaged over simulation trajectories. The average solvent accessibility profiles for the S-G614 closed state (pdb id 7KRQ) (A) and 1 RBD-up open form (pdb id 7KRR) (B). The positions of K417, E484, N501, A570, and D614G are shown in maroon-colored spheres. The average solvent accessibility profiles for SARS-CoV-2 S-B.1.1.7 closed form (pdb id 7N1U) (C) and 1 RBD-up open state (pdb id 7N1V) (D). The positions of K417, E484, N501Y, A570D, D614G, T716L, S982A, and D1118H are shown in maroon-colored spheres. The average solvent accessibility profiles for SARS-CoV-2 S-B.1.351 closed form (pdb id 7N1T) (E) and 1 RBD-up open state (pdb id 7N1Q) (F). The positions of L18F, D80A, D215G, K417N, E484K, N501Y, D614G, and A701V are shown in maroon-colored spheres.

318 In the S-B.1.1.7 states only A570D and S982A positions remain completely buried, while RBD sites  
319 (K417, E484, N501Y) become largely exposed and D614G position is partly exposed in both  
320 closed and open states (Figure 4C,D). The degree of solvent accessibility increased in the S-B.1.351  
321 states (Figure 4E,F). The NTD mutational positions and RBD sites K417N, E484K, N501Y displayed  
322 an appreciable level of exposure, while D614G considerably increases its solvent exposure in the  
323 open state. These observations are consistent with the overall increase in conformational flexibility  
324 in the S-B.1.1.7 and especially S-B.1.351 variants as both closed and open forms of these variants  
325 displayed a considerable plasticity in the functional RBD regions. Interestingly, common to all S  
326 protein variants, D614G site was characterized by a moderate level of solvent accessibility,  
327 reflecting the adaptability of the S protein near the mutational site where minor structural  
328 changes allow for rearrangements in the hinge regions.

330 **2.2. Functional Slow Modes of the SARS-CoV-2 S Protein Variants Reveal Role of A570D and D614G**  
331 **in the Hinge Regions Controlling Transitions between Open and Closed States**  
332

333 To identify hinge sites and characterize collective motions in the SARS-CoV-2 S-D614 and  
334 SARS-CoV-2 S-G614 structures, we performed PCA of atomistic reconstructed trajectories  
335 derived from CG simulations. Overall, the key functional signature of collective dynamics in  
336 these states are the preferences for NTD and RBD motions, suggesting that the conformational  
337 dynamics of these states can enable functional movements of RBDs to the erected,  
338 receptor-accessible conformation (Figures 5,6). The conserved hinge regions in the closed forms of



339 the S protein variants can regulate the inter-domain movements between RBD and NTD as well as  
 340 the relative motions of S1 and S2 regions. We first compared the slow mode profile averaged over  
 341 the first three lowest mode for the constrained S-G614 conformations. The major hinge positions  
 342 are located at F318, F592, A570, I572, Q613, G614 and Y855 residues. These sites emerged as  
 343 immobilized islands in both the closed and open states. Notably, A570 and F592 hinge residues  
 344 are situated near the inter-domain SD1-S2 interfaces and could act collectively as regulatory  
 345 switch centers governing the population shifts between closed and open forms. For the S-B.1.1.7  
 346 and S-B.1.351 closed conformations, mutational sites A570, S982, A701, T716 are aligned with  
 347 immobilized positions, while K417, E484 and N501 sites from the RBD regions belong to moving  
 348 regions (Figure 5C,E). A more revealing picture emerged from the analysis of collective dynamics for  
 349 the 1 RBD-up open states (Figures 5,6). In the S-G614 and S-B.1.1.7 open states, not only RBD-up  
 350 undergoes functional motions but significant displacements were observed for one of the  
 351 RBD-down protomers. Moreover, for the S-B.1.351 open state, functional movements were observed  
 352 for all RBD's even though the RBD-up displayed the larger magnitude of changes in the slow  
 353 modes. This indicated that all S variants may promote movements of the RBD regions which may  
 354 increase in the S-B.1.1.7 and especially S-B.1.351 conformations. As expected, the positions of  
 355 mutational changes G614, A570, T716 and S982 in the S-B.1.1.7 states (Figure 5C,D) and positions  
 356 G614 and A701 in the S-B.1.351 conformations (Figure 5E,F) corresponded to rigid sites near  
 357 hinge regions, while the RBD sites K417,E484 and N501 may experience functional changes due to  
 358 movements of the RBDs.

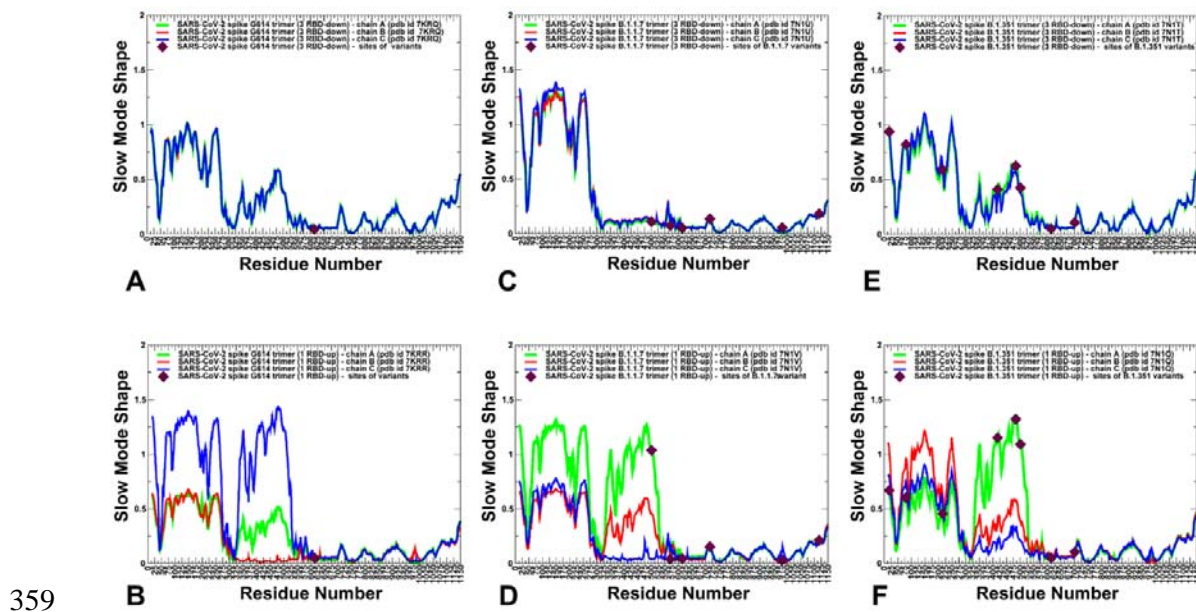

360 **Figure 5.** Functional dynamics of the SARS-CoV-2 S trimer structures. The essential mobility  
 361 profiles are averaged over the first three major low frequency modes. The essential mobility  
 362 profiles for the cryo-EM structures of SARS-CoV-2 S-G614 in the closed state, pdb id 7KRQ;  
 363 (A), the open 1 RBD-up state, pdb id 7KRR (B), S-B.1.1.7 closed form, pdb id 7N1U (C), S-B.1.1.7  
 364 open 1 RBD-up form, pdb id 7N1V (D), S-B.1.351 closed state, pdb id 7N1T (E), and S-B.1.351  
 365 open 1 RBD-up state, pdb id 7N1Q (F). The profiles for protomer chains A, B and C are shown in  
 366 green, red and blue lines respectively. The position of D614G is shown in maroon-colored spheres  
 367 for S-G614 on panels (A,B). The positions of K417, E484, N501Y, A570D, D614G, T716I, S982A,  
 368 and D1118H are shown in maroon-colored spheres for S-B.1.1.7 on panels (C,D). The positions of  
 369 L18F, D80A, D215G, K417N, E484K, N501Y, D614G, and A701V are shown in maroon-colored  
 370 spheres for S-B.1.351 on panels (E,F).

371

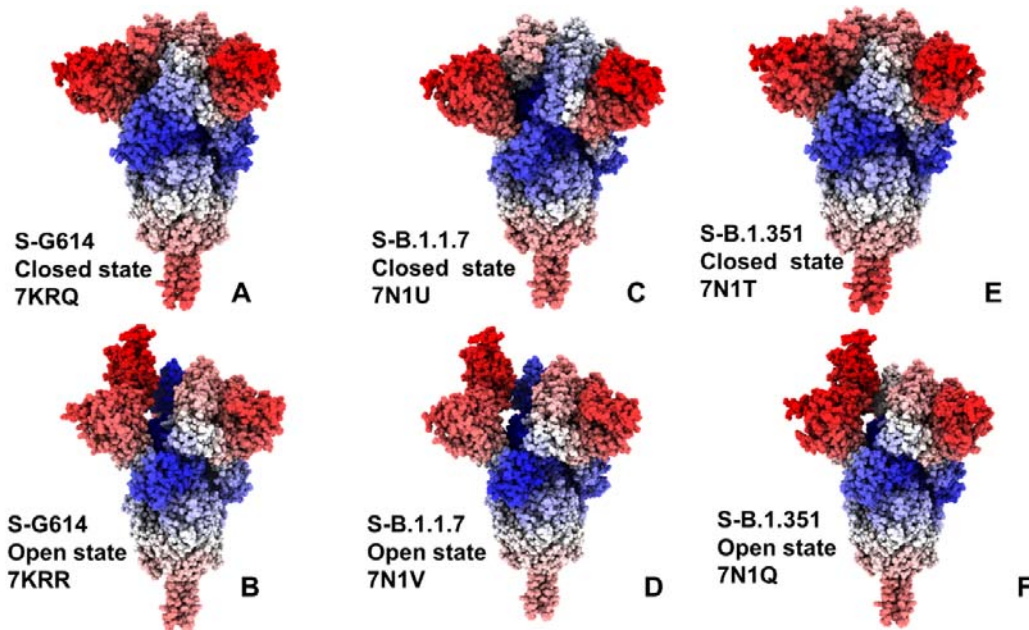

372

373 **Figure 6.** Structural maps of the essential mobility profiles for the SARS-CoV-2 S protein  
374 variants. The dynamics map for S-G614 closed state (pdb id 7KRQ) (A) and 1 RBD-up open form  
375 (pdb id 7KRR) (B). Structural maps of the conformational mobility profiles for SARS-CoV-2  
376 S-B.1.1.7 closed form (pdb id 7N1U) (C) and 1 RBD-up open state (pdb id 7N1V) (D). Structural  
377 maps of the conformational mobility profiles for SARS-CoV-2 S-B.1.351 closed form (pdb id 7N1T)  
378 (E) and 1 RBD-up open state (pdb id 7N1Q) (F). The structures are in sphere-based  
379 representation rendered using UCSF ChimeraX [107] with the rigidity-to-flexibility sliding scale  
380 colored from blue to red.

381

382

### 383 2.3. Local Frustration Analysis of the SARS-CoV-2 S Conformational States: Mutational Frustration 384 Neutrality of Variant Sites and Differential Frustration of the Closed and Open States

385

386 We employed the conformational ensembles of the S-G614, S-B.1.1.7 and S-B.1.351 trimers to  
387 estimate the average local frustration profiles of the S residues and quantify the relationship between  
388 structural plasticity and mutational frustration. This analysis is based on scanning of the  
389 conformational ensembles by local frustratometer which computes the local frustration index  
390 based on the contribution of a residue or residue pairs to the energy in a given conformation as  
391 compared to what it would contribute in decoy conformations [108-112]. The distribution of local  
392 mutational frustration showed a low relative density of highly frustrated population for residues  
393 targeted by mutations in the S trimer mutants (Figure 7). This is particularly apparent for the  
394 S-G614 conformations where K417, E484, N501, A570 and G614 sites featured a very small density  
395 of highly frustrated positions (Figure 7A). In some contrast, sites N501 and T716 in the S-B.1.1.7  
396 conformations may be highly frustrated, while N501 and E484 may also feature an appreciable  
397 relative density of highly frustrated positions (Figure 7D). The role of frustration in the RBD  
398 regions is particularly interesting in light of recent evidence that the disordered or highly flexible  
399 regions can be critically important for mediating allostery and binding to multiple protein  
400 partners [113-117]. Notably, the population of highly frustrated conformations is relatively minor  
401 for all S conformations (Figure 7A,D,G). Importantly, we observed that sites of mutations in  
402 S-G614, S-B.1.1.7 and S-B.1.351 variants are largely associated with neutrally frustrated positions in  
403 both closed and open forms (Figure 7 B,E,H). Of notice is somewhat larger density of neutral  
404 frustration for these sites in the open states.

405 A comparison of local mutational frustration indexes for the functional positions including sites of  
 406 variants (K417, E484, N501), hinge position A570 and G614 revealed interesting shifts between the  
 407 closed and open forms of S-G614 trimer (Figure 7). The high frustration density index for these  
 408 positions is uniformly small and similar in both closed and open conformations. While this may  
 409 be expected for hinge positions A570 and G614, it was somewhat revealing for the RBD positions,  
 410 especially mobile E484 and N501 residues. The relative density of neutral frustration is pronounced  
 411 for all sites, especially for the N501 and G614 positions, showing no appreciable differences  
 412 between the closed and open states (Figure 7B,E). Hence, sites of circulating variants located in  
 413 the flexible RBD regions showed a preponderance towards neutral mutational frustration.  
 414  
 415

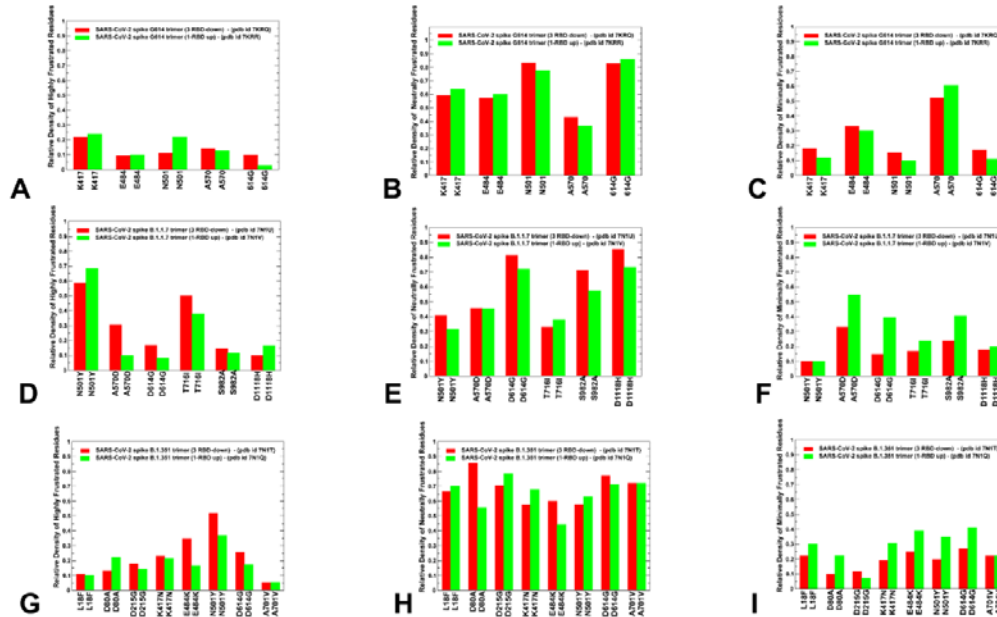

416  
 417 **Figure 7.** A comparison of the ensemble-averaged local mutational frustration between closed and  
 418 open forms for sites of mutational variants and hinge positions of the S-G614 variant (A-C),  
 419 S-B.1.1.7 variant (D-F) and S-B.1.351 variant (G-I). The relative density of highly frustrated,  
 420 neutrally frustrated and minimally frustrated residues are shown. The relative density index is  
 421 shown in red bars for the closed (3 RBD-down) states and in green bars for the 1 RBD-up open  
 422 states.  
 423

424 There are several revealing differences in the local frustration distributions of the S-B.1.1.7 (Figure  
 425 7D,E,F) and S-B.1.351 conformations (Figure 7G,H,I). Indeed, for the S-B.1.1.7 conformations,  
 426 mutational positions D614G, S982A, D1118H are mostly neutrally frustrated. At the same time, the  
 427 key hinge position A570D showed a similar relative density of neutral and minimal frustration,  
 428 while N501Y mutation is associated mostly with high and neutral level of frustration. This is  
 429 consistent with the structural rigidity of the A570 hinge position and significant conformational  
 430 plasticity of N501 site in the S-B.1.1.7 conformations. In the S-B.1.351 conformations, we  
 431 observed that sites targeted by mutations in the exposed RBD and NTD regions also featured  
 432 mostly neutral level of local frustration, suggesting that mutational adaptability in these positions  
 433 would not perturb significantly structural stability while potentially allowing for functional  
 434 plasticity during binding with the host receptor or antibodies. The relative density of minimal  
 435 and high frustration for all mutational sites in the S-B.1.351 conformations is fairly low including  
 436 NTD, RBD and S2 positions (Figure 7G-I). This could imply that the S-B.1.351 variant could  
 437 promote moderate level of conformational variability and functional adaptability in both closed  
 438 and open states.

439 The relationship between frustration in proteins and their function has been explored in illuminating  
440 studies by Wolynes [118]. The protein folding landscape theory established that while minimally  
441 frustrated interactions may have evolved in proteins to enable for strongly funneled landscapes,  
442 a number of functional regions and specific protein sites could have been selected to be frustrated to  
443 allow for modulation of global motions and binding adaptability with various interaction  
444 partners. In this context, our results suggested that neutral frustration patterns allow for  
445 moderately suboptimal inter-protomer and S1-S2 interactions leading to multiple states, which can  
446 be exploited to control binding with the ACE2 and to multiple partners. The results also offer  
447 an interesting rationale for the important role of A570D and D614G mutational sites in the S-B.1.1.7  
448 and S-B.1.351 variants. These generally stable positions are involved in the inter-protomer hinge  
449 regions that enable control functional transitions between closed and open forms. Importantly,  
450 D614G is shared by all variants. We observed that in the S-G614 and S-B.1.1.7 conformations A570 and  
451 A570D positions are predominantly minimally frustrated but could display an appreciable  
452 density of neutral frustration. This minimal-to-neutral frustration level could allow for some  
453 mutational adaptability in the hinge position that retains its regulatory role in the S variants.  
454 A slightly different distribution is characteristic of the D614G position where the predominant  
455 density of neutral frustration was observed (Figure 7). According to our analysis, there is a  
456 greater degree of mutational and conformational plasticity near the D614G position that could allow  
457 for greater variability and diversity of the open states. This may be exploited by virus to engage  
458 A570D and D614G sites in a cross-talk to modulate the thermodynamic equilibrium between the  
459 closed and open states as well as level of functional plasticity in the open substates required for  
460 allosteric function and binding. Based on our analysis, we suggest that by exploiting  
461 moderate frustration A570D and D614G substitutions in the S-B.1.1.7 and S-B.1.351 conformations  
462 may allow for the increased plasticity in the inter-protomer regions that would modulate  
463 functional motions of the RBDs without compromising stability of the S1-S2 interfaces.  
464 The generally prevailing pattern of frustration neutrality for sites targeted by mutations across all  
465 studied VOC's and dynamic contributions of high and neutral frustration in the RBD sites E484  
466 and N501 are important findings of this analysis. The highly frustrated interactions may in  
467 principle conflict with the robust folding of the domain and could reflect evolutionary constraints  
468 other than folding. This may explain the specific local frustration pattern of the A570 and D614  
469 positions that combined could provide moderate adaptability of the inter-protomer regions. On the  
470 other hand, local frustration is often an important driver of allosteric changes. Our results  
471 indicated that high-to-neutral frustration level is characteristic of the RBD positions targeted by  
472 mutations, especially N501. The relatively high frustration in these positions may allow for discrete  
473 set of configurations involving local motions of the frustrated residues. Combined with  
474 modulation of the inter-protomer hinge regions by A570D and D614G positions, the local  
475 frustration in the RBD mutational sites could drive dynamical transitions between closed and open  
476 states accompanied by local adjustments of the RBD residues.

477

### 478 *2.3. Mutational Scanning of Protein Stability the SARS-CoV-2 S-614 Conformational States Reveals* 479 *Energetic Effects of the D614G Mutation*

480

481 We employed the equilibrium ensembles generated by simulations of the SARS-CoV-2 protein  
482 structures to perform mutational scanning of the spike protein residues and mutational sensitivity  
483 analysis of the S-B.1.1.7 (Figure 8) and S-B.1.351 mutant proteins (Figure 9). The protein  
484 stability  $\Delta\Delta G$  changes were computed by averaging the results of computations over 1,000  
485 samples obtained from simulation trajectories. Using mutational cartography, we first  
486 examined the pattern of free energy changes for the S-B.1.1.7 closed and open states (Figure 8).  
487 Interestingly, it appeared that mutations N501Y, A570D and D614G produced larger  
488 destabilization changes in the open state (Figure 8B). This is consistent with the dynamics analysis  
489 indicating that S-B.1.1.7 mutations can significantly destabilize the closed state and moderately  
490 stabilize the open state (Figures 2,3). Importantly, these differences were found in the key positions

491 that collectively responsible for modulation of the inter-protomer interactions and positioning of the  
492 RBD regions. Mutations in other functional RBD positions (K417, E484) as well as in T716, S982  
493 and D1118 positions resulted in the minor energy changes in both closed (Figure 8A) and open  
494 S-B.1.1.7 conformations (Figure 8B). S982A substitution in the S-B.1.1.7 conformations abolished  
495 hydrogen bonding between central helices of the S2 domain and G545 in the CTD1 region [70]. We  
496 found that mutations of A982 to other positions in the S-B.1.1.7 states resulted in moderate and often  
497 stabilizing changes. Hence, this position is a relatively soft residue where mutations can be tolerated  
498 without significant impact on the protein stability. The mutational cartography analysis revealed  
499 that A570D and D614G mutational positions in the S-B.1.1.7 conformations are the most sensitive  
500 to modifications which result in more significant destabilizing changes (Figure 8). Importantly,  
501 the effect of mutations in these positions on the protein stability is greater in the open state  
502 (Figure 8B). The S-B.1.1.7 open state featured a salt bridge involving interactions of A570D  
503 with K854 of the other protomer [70]. In the closed S-B.1.1.7 states A570D can form the  
504 inter-protomer interactions with K964 and N856 that together comprise an important hinge cluster.  
505 Functional dynamics analysis of slow modes confirmed the role of A570D as a potential  
506 regulatory switch that controls RBD movements. Although modifications of A570D are generally  
507 destabilizing, the range of free energy changes associated with this position suggested a moderate  
508 level of residual energetic frustration and suboptimal interactions (Figure 8). These findings  
509 are consistent with a series of structural studies showing a moderate degree of conformational  
510 heterogeneity in the interprotomer interactions formed by A570D in different substates of the  
511 S-B.1.1.7 protein [70,71]. Interestingly, substitutions in the D614G position are more  
512 destabilizing in both closed and open S-B.1.1.7 states (Figure 8), pointing to dynamic  
513 rearrangements near D614G position.

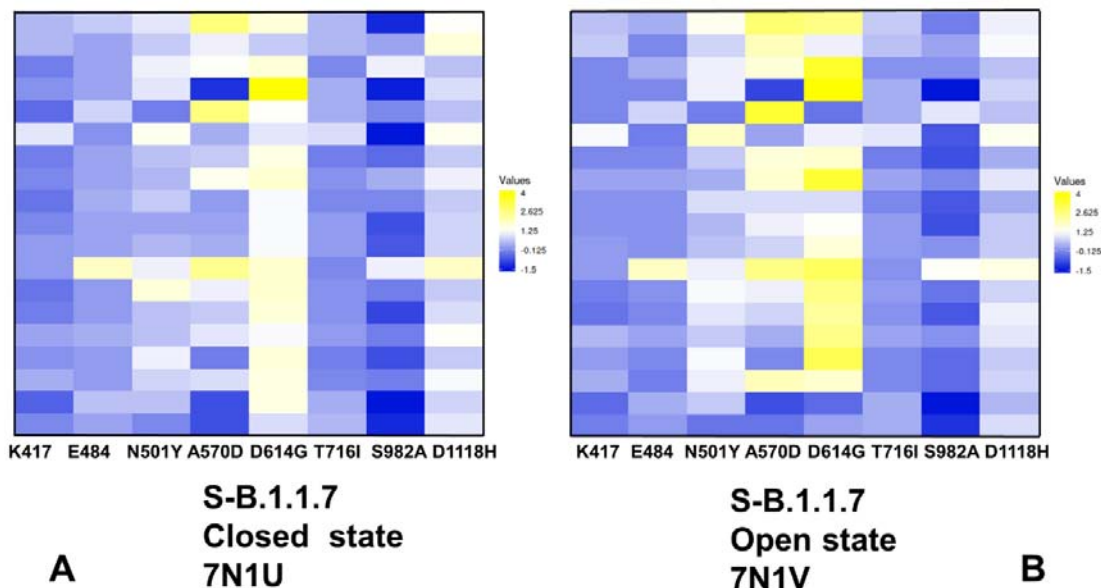

514 **Figure 8.** Ensemble-based mutational profiling of the SARS-CoV-2 S-B.1.1.7 protein stability. The  
515 mutational scanning heatmaps are shown for the closed state (A) and open state (B). The heatmaps  
516 show the computed binding free energy changes for 19 single mutations on the sites of variants. The  
517 squares on the heatmap are colored using a 3-colored scale – from blue to white and to yellow, with  
518 yellow indicating the largest unfavorable effect on stability. The standard errors of the mean for  
519 binding free energy changes were based on 5 independent CG trajectories for each of the S-B.1.1.7  
520 states and different number of selected samples from a given trajectory (500, 1,000 and 2,000  
521 samples) are ~ 0.11-0.24 kcal/mol using averages over different trajectories and ≤ 0.15  
522 kcal/mol from computations based on different number of samples from a single trajectory.

523  
524  
525



526 Together, A570D and D614G sites are involved in the inter-protomer interactions in the  
527 S-B.1.1.7 states and contribute to the hinge clusters that modulate RBD motions. The results of  
528 mutational scanning are supportive of the local frustration analysis that displayed neutral-to  
529 minimal frustration densities for A570D and D614G positions in the S-B.1.1.7 state. We suggest that  
530 neutral-to-minimal level of energetic frustration and moderate conformational plasticity in these  
531 regions and near the inter-domain interfaces could allow for emergence of mutational variants  
532 in sites responsible for allosteric modulation of conformational transitions between closed and  
533 open S states.

534  
535 Mutational scanning maps for variant positions in the S-B.1.351 conformations showed similar and  
536 moderate stabilization changes for the NTD variant L18F, D80A, and D215G. It is evident that  
537 many substitutions in G215 position can be in fact energetically favorable for the protein stability  
538 (Figure 9). This pattern for the NTD mutational sites is shared in the closed and open states,  
539 suggesting that these variants could promote destabilization of the S-B.1.351 conformations and  
540 increase mobility and conformational variability of the NTDs. Moderate free energy changes are also  
541 seen for K417N and E484K sites in the closed and open states. Interestingly, there is a clear  
542 difference in the mutational map for the N501Y position (Figure 9). While variations in this  
543 position are only moderately destabilizing in the closed state, the destabilization is increased in the  
544 open S-B.1.351 conformation. Hence, N501Y may become less frustrated in the open state and  
545 provide for more optimal interactions of the RBDs. In both states of S-B.1.351 variant, we observed  
546 appreciable destabilization changes induced by modifications in the D614G position (Figure 9).  
547 This is consistent with the increased density of minimal frustration for this position in the open  
548 S-B.1.351 state.

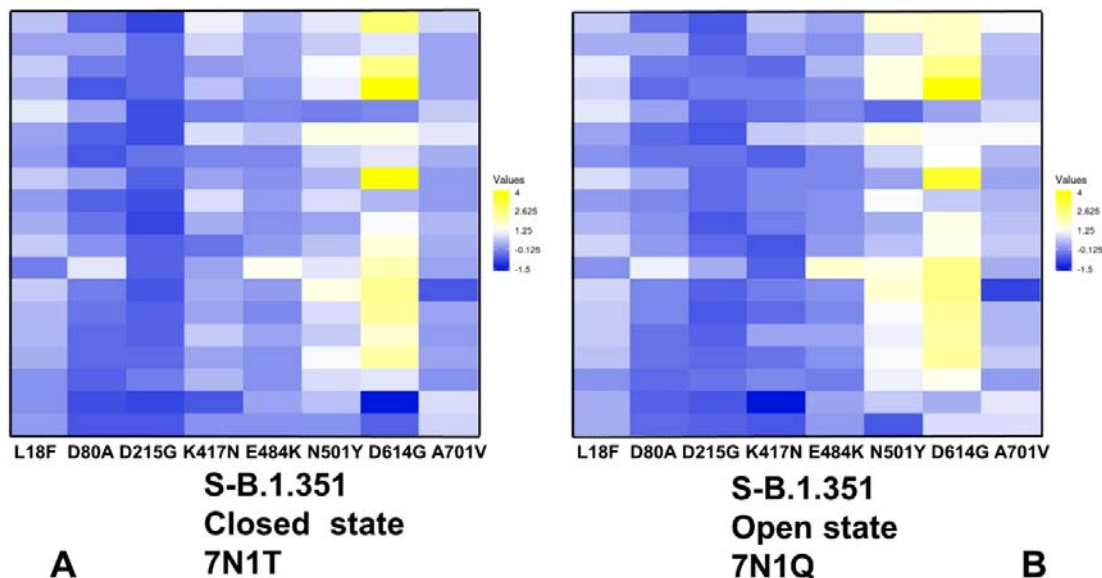

549  
550 **Figure 9.** Ensemble-based mutational profiling of the SARS-CoV-2 S-B.1.351 protein stability. The  
551 mutational scanning heatmaps are shown for the closed state (A) and open state (B). The heatmaps  
552 show the computed binding free energy changes for 19 single mutations on the sites of variants. The  
553 squares on the heatmap are colored using a 3-colored scale – from blue to white and to yellow, with  
554 yellow indicating the largest unfavorable effect on stability. The standard errors of the mean for  
555 binding free energy changes were based on 5 independent CG trajectories for each of the S-B.1.351  
556 states and different number of selected samples from a given trajectory (500, 1,000 and 2,000  
557 samples) are ~ 0.18-0.27 kcal/mol using averages over different trajectories and ≤ 0.17  
558 kcal/mol from computations based on different number of samples from a single trajectory.

559  
560

561 Importantly, the results showed a significant difference between S-B.1.1.7 and S-B.1.351 structures in  
562 the mutational profiles for K417/E484/N501 positions (Figures 8,9). We found that these K417N,  
563 E484K and N501Y sites can afford greater mutational tolerance and conformational plasticity in  
564 the S-B.1.351 conformations. This suggested that the level of mutational and conformational  
565 plasticity can progressively increase from S-G614 to S-B.1.1.7 and S-B.1.351 variants. The results also  
566 suggested an interesting interplay between mutation-induced protein stability and local frustration  
567 patterns. It is interesting to examine these relationships in the context of allosteric regulation  
568 models centered on the energetic frustration that could emerge at the inter-domain interfaces  
569 [113-117]. In these models, activation or repression functions may be encoded in the  
570 conformational ensemble and reveal through frustration-based allosteric regulation of the  
571 inter-domain interactions. The energetic scanning and local frustration analyses revealed the  
572 inherent mutational plasticity of the sites targeted by circulating variants. Mutational positions that  
573 are involved in hinge clusters are characterized by some degree of energetic frustration, thereby  
574 allowing for allosteric couplings and modulation of the RBD motions leading to the greater  
575 diversity of RBD-exposed conformations. These results suggested that S protein variants may  
576 uniquely exploit the intrinsic conformational and mutational plasticity of the S proteins that is  
577 broadly distributed and is characteristic of not only RBD regions but also present in the  
578 inter-protomer and inter-domain regions. We argue that S-B.1.1.7 and S-B.1.351 variants may  
579 leverage this plasticity to adopt a mechanism of frustration-based allosteric modulation at the  
580 inter-protomer interfaces to differentially control binding with the host cell receptor ACE2 and  
581 interacting proteins.

582  
583

### 584 **3. Materials and Methods**

#### 585 *3.1 Structure Preparation and Analysis*

586

587 All structures were obtained from the Protein Data Bank [119,120]. During structure preparation  
588 stage, protein residues in the crystal structures were inspected for missing residues and protons.  
589 Hydrogen atoms and missing residues were initially added and assigned according to the WHATIF  
590 program web interface [121,122]. The structures were further pre-processed through the Protein  
591 Preparation Wizard (Schrödinger, LLC, New York, NY) and included the check of bond order,  
592 assignment and adjustment of ionization states, formation of disulphide bonds, removal of  
593 crystallographic water molecules and co-factors, capping of the termini, assignment of partial  
594 charges, and addition of possible missing atoms and side chains that were not assigned in the initial  
595 processing with the WHATIF program. The missing loops in the studied cryo-EM structures of  
596 the SARS-CoV-2 S protein were reconstructed and optimized using template-based loop  
597 prediction approaches ModLoop [123], ArchPRED server [124] and further confirmed by FALC  
598 (Fragment Assembly and Loop Closure) program [125]. The side chain rotamers were refined  
599 and optimized by SCWRL4 tool [126]. The conformational ensembles were also subjected to  
600 all-atom reconstruction using PULCHRA method [127] and CG2AA tool [128] to produce atomistic  
601 models of simulation trajectories. The protein structures were then optimized using atomic-level  
602 energy minimization with a composite physics and knowledge-based force fields as implemented in  
603 the 3Drefine method [129]. The atomistic structures from simulation trajectories were further  
604 elaborated by adding N-acetyl glycosamine (NAG) glycan residues and optimized. The  
605 glycosylated microenvironment for atomistic models of the simulation trajectories was mimicked  
606 by using the structurally resolved glycan conformations for 22 most occupied N-glycans  
607 [130,131] in each as determined in the cryo-EM structures of the SARS-CoV-2 spike S  
608 trimer in the closed state (K986P/V987P,) (pdb id 6VXX) and open state (pdb id 6VYB), and  
609 the cryo-EM structure SARS-CoV-2 spike trimer (K986P/V987P) in the open state (pdb id 6VSB).

610  
611

### 612 3.2 Coarse-Grained Simulations

613

614 Coarse-grained (CG) models are computationally effective approaches for simulations of large  
615 systems over long timescales. We employed CABS-flex approach that efficiently combines a  
616 high-resolution coarse-grained model and efficient search protocol capable of accurately  
617 reproducing all-atom MD simulation trajectories and dynamic profiles of large biomolecules on a  
618 long time scale [132-138]. In this high-resolution model, the amino acid residues are represented  
619 by  $C\alpha$ ,  $C\beta$ , the center of mass of side chains and another pseudoatom placed in the center of the  
620  $C\alpha$ - $C\alpha$  pseudo-bond. In this model, the amino acid residues are represented by  $C\alpha$ ,  $C\beta$ , the center  
621 of mass of side chains and the center of the  $C\alpha$ - $C\alpha$  pseudo-bond. The CABS-flex approach  
622 implemented as a Python 2.7 object-oriented standalone package was used in this study to  
623 allow for robust conformational sampling proven to accurately recapitulate all-atom MD  
624 simulation trajectories of proteins on a long time scale [136-138]. Conformational sampling in  
625 the CABS-flex approach is conducted with the aid of Monte Carlo replica-exchange dynamics and  
626 involves local moves of individual amino acids in the protein structure and global moves of  
627 small fragments [136]. The default settings were used in which soft native-like restraints are  
628 imposed only on pairs of residues fulfilling the following conditions: the distance between their  
629  $C^\alpha$  atoms was smaller than 8 Å, and both residues belong to the same secondary structure elements.  
630 A total of 1,000 independent CG-CABS simulations were performed for each of the studied systems.  
631 In each simulation, the total number of cycles was set to 10,000 and the number of cycles between  
632 trajectory frames was 100. MODELLER-based reconstruction of simulation trajectories to all-atom  
633 representation provided by the CABS-flex package was employed to produce atomistic  
634 models of the equilibrium ensembles for studied systems [136]. We also performed principal  
635 component analysis (PCA) of reconstructed trajectories derived from CABS-CG simulations  
636 using the CARMA package [139].

### 637 3.3 Mutational Scanning and Sensitivity Analysis

638 To compute protein stability changes in the SARS-CoV-2 S structures, we conducted a systematic  
639 alanine scanning of protein residues in the SARS-CoV-2 trimer mutants as well as mutational  
640 sensitivity analysis at the mutational site for both SARS-CoV-2 S-D614 and SARS-CoV-2 S-G614  
641 structures. Two different approaches were used. Alanine scanning of protein residues was  
642 performed using FoldX approach [140-145]. and BeAtMuSiC approach [146-148]. If a free  
643 energy change between a mutant and the wild type (WT) proteins  $\Delta\Delta G = \Delta G(\text{MT}) - \Delta G(\text{WT}) > 0$ , the  
644 mutation is destabilizing, while when  $\Delta\Delta G < 0$  the respective mutation is stabilizing. BeAtMuSiC  
645 approach is based on statistical potentials describing the pairwise inter-residue distances,  
646 backbone torsion angles and solvent accessibilities, and considers the effect of the mutation on the  
647 strength of the interactions at the interface and on the overall stability of the complex.<sup>121-123</sup> We  
648 computed the ensemble-averaged binding free energy changes using equilibrium samples from  
649 atomistic trajectories. The binding free energy changes were computed by averaging the results over  
650 100 trajectory samples for each of the studied systems.

### 651 4. Conclusions

652

653 In this work, we combined molecular simulations and collective dynamics analysis with the  
654 ensemble-based frustration analysis to characterize conformational plasticity and functional  
655 adaptability of the closed and open states for the S-G614, S-B.1.1.7 and S-B.1.351 variant. The  
656 conformational dynamics analysis revealed progressively increased mobility of the S-B.1.1.7 and  
657 S-B.1.351 variant in the open states. Collective dynamics of the S protein variants confirmed the  
658 critical regulatory role of the A570D and D614G positions acting as components of hinge clusters  
659 controlling the transitions between closed and open forms. This analysis suggested that in the  
660 S-B.1.1.7 and S-B.1.351 variants all RBDs can experience significant functional movements  
661 including the RBD-down conformations. We found that mutations in the S variants may promote

662 movements of the RBD regions which may increase in the S-B.1.1.7 and especially S-B.1.351  
663 conformations. The local frustration analysis showed a prevailing pattern of frustration neutrality  
664 for sites targeted by mutations across all studied variant and dynamic contributions of high  
665 and neutral frustration in the RBD sites E484 and N501 positions. A strong preference of the  
666 mutational sites towards neutrally frustrated environment may allow for moderately suboptimal  
667 inter-protomer interactions and subtle control of S binding with the ACE2 and to multiple  
668 partners. Mutational scanning of protein stability revealed that level of mutational and energetic  
669 plasticity can progressively increase from S-G614 to the S-B.1.1.7 and S-B.1.351 variants. The results  
670 indicated that K417N, E484K and N501Y sites can afford greater mutational tolerance and  
671 conformational plasticity in the S-B.1.351 conformations. The results also suggested an interesting  
672 interplay between mutation-induced protein stability, local frustration and allosteric modulation of  
673 the S protein dynamics. We found that the A570D and D614G mutations may introduce a moderate  
674 level of energetic frustration and conformational plasticity near the inter-protomer and  
675 inter-domain interfaces. Coupled with flexibility of more frustrated RBD mutational sites, this  
676 could allow for allosteric couplings between the hinge clusters and RBD regions. Through this  
677 frustration-driven allosteric mechanism, mutational variants can impose allosteric control over  
678 functional movements and conformational diversity of the RBD regions. This landscape-based  
679 mechanism of mutation-induced energetic frustration in the S protein may result in the greater  
680 adaptability and the emergence of multiple conformational substates in the open form.

681

682 **Author Contributions:** Conceptualization, G.V.; methodology, G.V.; software, G.V.; validation, G.V.; formal  
683 analysis, G.V.; investigation, G.V.; resources, G.V.; data curation, G.V.; writing—original draft preparation,  
684 G.V.; writing—review and editing, G.V.; visualization, G.V.; supervision, G.V.; project administration, G.V.;  
685 funding acquisition, G.V. All authors have read and agreed to the published version of the manuscript.

686 **Funding:** This research received no external funding

687 **Acknowledgments:** The author thanks Schmid College of Science and Technology, Chapman University for  
688 providing computing resources at the Keck Center for Science and Engineering

689 **Conflicts of Interest:** The authors declare that the research was conducted in the absence of any commercial or  
690 financial relationship that could be construed as a potential conflict of interest. The funders had no role in the  
691 design of the study; in the collection, analyses, or interpretation of data; in the writing of the manuscript, or in  
692 the decision to publish the results.

693

## 694 References

- 695 1. Tai, W.; He, L.; Zhang, X.; Pu, J.; Voronin, D.; Jiang, S.; Zhou, Y.; Du, L. Characterization of the  
696 receptor-binding domain (RBD) of 2019 novel coronavirus: implication for development of RBD protein as  
697 a viral attachment inhibitor and vaccine. *Cell. Mol. Immunol.* **2020**, *17*, 613-620.
- 698 2. Wang, Q.; Zhang, Y.; Wu, L.; Niu, S.; Song, C.; Zhang, Z.; Lu, G.; Qiao, C.; Hu, Y.; Yuen, K. Y.; Zhou, H.;  
699 Yan, J.; Qi, J. Structural and functional basis of SARS-CoV-2 entry by using human ACE2. *Cell* **2020**, *181*,  
700 894-904.e9.
- 701 3. Walls, A. C.; Park, Y. J.; Tortorici, M. A.; Wall, A.; McGuire, A. T.; Velesler, D. Structure, Function, and  
702 Antigenicity of the SARS-CoV-2 Spike Glycoprotein. *Cell* **2020**, *181*, 281-292.
- 703 4. Wrapp, D.; Wang, N.; Corbett, K. S.; Goldsmith, J. A.; Hsieh, C. L.; Abiona, O.; Graham, B. S.; McLellan, J.  
704 S. Cryo-EM structure of the 2019-nCoV spike in the prefusion conformation. *Science* **2020**, *367*, 1260-1263.
- 705 5. Cai, Y.; Zhang, J.; Xiao, T.; Peng, H.; Sterling, S. M.; Walsh, R. M., Jr.; Rawson, S.; Rits-Volloch,  
706 S.; Chen, B. Distinct conformational states of SARS-CoV-2 spike protein. *Science* **2020**, *369*, 1586-1592.
- 707 6. Hsieh, C. L.; Goldsmith, J. A.; Schaub, J. M.; DiVenere, A. M.; Kuo, H. C.; Javanmardi, K.; Le, K.  
708 C.; Wrapp, D.; Lee, A. G.; Liu, Y., et al. Structure-based design of prefusion-stabilized SARS-CoV-2  
709 spikes. *Science* **2020**, *369*, 1501-1505.
- 710 7. Henderson, R.; Edwards, R. J.; Mansouri, K.; Janowska, K.; Stalls, V.; Gobeil, S. M. C.; Kopp, M.;  
711 Li, D.; Parks, R.; Hsu, A. L., et al. Controlling the SARS-CoV-2 spike glycoprotein conformation. *Nat.*  
712 *Struct. Mol. Biol.* **2020**, *27*, 925-933.

- 713 8. McCallum, M.; Walls, A. C.; Bowen, J. E.; Corti, D.; Veessler, D. Structure-guided covalent stabilization  
714 of coronavirus spike glycoprotein trimers in the closed conformation. *Nat. Struct. Mol. Biol.* **2020**, *27*,  
715 942-949.
- 716 9. Xiong, X.; Qu, K.; Ciazynska, K. A.; Hosmillo, M.; Carter, A. P.; Ebrahimi, S.; Ke, Z.; Scheres, S.  
717 H. W.; Bergamaschi, L.; Grice, G. L., et al. A thermostable, closed SARS-CoV-2 spike protein trimer. *Nat.*  
718 *Struct. Mol. Biol.* **2020**, *27*, 934-941.
- 719 10. Benton, D. J.; Wrobel, A. G.; Xu, P.; Roustan, C.; Martin, S. R.; Rosenthal, P. B.; Skehel, J. J.;  
720 Gamblin, S. J. Receptor binding and priming of the spike protein of SARS-CoV-2 for membrane fusion.  
721 *Nature* **2020**, *588*, 327-330.
- 722 11. Turoňová, B.; Sikora, M.; Schürmann, C.; Hagen, W. J. H.; Welsch, S.; Blanc, F. E. C.; von Bülow,  
723 S.; Gecht, M.; Bagola, K.; Hörner, C.; van Zandbergen, G.; Landry, J.; de Azevedo, N. T. D.;  
724 Mosalaganti, S.; Schwarz, A.; Covino, R.; Mühlebach, M. D.; Hummer, G.; Krijnse Locker, J.; Beck,  
725 M. In situ structural analysis of SARS-CoV-2 spike reveals flexibility mediated by three hinges. *Science*  
726 **2020**, *370*, 203-208.
- 727 12. Lu, M.; Uchil, P. D.; Li, W.; Zheng, D.; Terry, D. S.; Gorman, J.; Shi, W.; Zhang, B.; Zhou, T.;  
728 Ding, S.; Gasser, R.; Prevost, J.; Beaudoin-Bussieres, G.; Anand, S. P.; Laumaea, A.; Grover, J. R.;  
729 Lihong, L.; Ho, D. D.; Mascola, J.; Finzi, A.; Kwong, P. D.; Blanchard, S. C.; Mothes, W. Real-time  
730 conformational dynamics of SARS-CoV-2 spikes on virus particles. *Cell Host Microbe* **2020**, *28*, 880-891.e8
- 731 13. Gavor, E.; Choong, Y. K.; Er, S. Y.; Sivaraman, H.; Sivaraman, J. Structural Basis of SARS-CoV-2 and  
732 SARS-CoV Antibody Interactions. *Trends Immunol* **2020**, *41*, 1006-1022.
- 733 14. Finkelstein, M. T.; Mermelstein, A. G.; Parker Miller, E.; Seth, P. C.; Stancovski, E. D.; Fera, D., Structural  
734 Analysis of Neutralizing Epitopes of the SARS-CoV-2 Spike to Guide Therapy and Vaccine Design  
735 Strategies. *Viruses* **2021**, *13*,134.
- 736 15. Barnes, C. O.; Jette, C. A.; Abernathy, M. E.; Dam, K. A.; Esswein, S. R.; Gristick, H. B.; Malyutin, A. G.;  
737 Sharaf, N. G.; Huey-Tubman, K. E.; Lee, Y. E.; Robbiani, D. F.; Nussenzweig, M. C.; West, A. P., Jr.;  
738 Bjorkman, P. J. SARS-CoV-2 neutralizing antibody structures inform therapeutic strategies. *Nature* **2020**,  
739 *588*, 682-687.
- 740 16. Barnes, C. O.; West, A. P., Jr.; Huey-Tubman, K. E.; Hoffmann, M. A. G.; Sharaf, N. G.; Hoffman, P. R.;  
741 Koranda, N.; Gristick, H. B.; Gaebler, C.; Muecksch, F.; Lorenzi, J. C. C.; Finkin, S.; Hägglöf, T.; Hurley, A.;  
742 Millard, K. G.; Weisblum, Y.; Schmidt, F.; Hatziioannou, T.; Bieniasz, P. D.; Caskey, M.; Robbiani, D. F.;  
743 Nussenzweig, M. C.; Bjorkman, P. J. Structures of Human Antibodies Bound to SARS-CoV-2 Spike Reveal  
744 Common Epitopes and Recurrent Features of Antibodies. *Cell* **2020**, *182*, 828-842.e16.
- 745 17. Hansen, J.; Baum, A.; Pascal, K. E.; Russo, V.; Giordano, S.; Wloga, E.; Fulton, B. O.; Yan, Y.; Koon, K.;  
746 Patel, K.; Chung, K. M.; Hermann, A.; Ullman, E.; Cruz, J.; Rafique, A.; Huang, T.; Fairhurst, J.; Libertiny,  
747 C.; Malbec, M.; Lee, W. Y.; Welsh, R.; Farr, G.; Pennington, S.; Deshpande, D.; Cheng, J.; Watty, A.;  
748 Bouffard, P.; Babb, R.; Levenkova, N.; Chen, C.; Zhang, B.; Romero Hernandez, A.; Saotome, K.; Zhou, Y.;  
749 Franklin, M.; Sivapalasingam, S.; Lye, D. C.; Weston, S.; Logue, J.; Haupt, R.; Frieman, M.; Chen, G.; Olson,  
750 W.; Murphy, A. J.; Stahl, N.; Yancopoulos, G. D.; Kyratsous, C. A., Studies in humanized mice and  
751 convalescent humans yield a SARS-CoV-2 antibody cocktail. *Science* **2020**, *369*, 1010-1014.
- 752 18. Wu, Y.; Wang, F.; Shen, C.; Peng, W.; Li, D.; Zhao, C.; Li, Z.; Li, S.; Bi, Y.; Yang, Y.; Gong, Y.; Xiao, H.; Fan,  
753 Z.; Tan, S.; Wu, G.; Tan, W.; Lu, X.; Fan, C.; Wang, Q.; Liu, Y.; Zhang, C.; Qi, J.; Gao, G. F.; Gao, F.; Liu, L. A  
754 noncompeting pair of human neutralizing antibodies block COVID-19 virus binding to its receptor ACE2.  
755 *Science* **2020**, *368*, 1274-1278.
- 756 19. Shi, R.; Shan, C.; Duan, X.; Chen, Z.; Liu, P.; Song, J.; Song, T.; Bi, X.; Han, C.; Wu, L.; Gao, G.; Hu, X.;  
757 Zhang, Y.; Tong, Z.; Huang, W.; Liu, W. J.; Wu, G.; Zhang, B.; Wang, L.; Qi, J.; Feng, H.; Wang, F. S.; Wang,  
758 Q.; Gao, G. F.; Yuan, Z.; Yan, J. A human neutralizing antibody targets the receptor-binding site of  
759 SARS-CoV-2. *Nature* **2020**, *584*,120-124.
- 760 20. Ju, B.; Zhang, Q.; Ge, J.; Wang, R.; Sun, J.; Ge, X.; Yu, J.; Shan, S.; Zhou, B.; Song, S.; Tang, X.; Lan, J.; Yuan,  
761 J.; Wang, H.; Zhao, J.; Zhang, S.; Wang, Y.; Shi, X.; Liu, L.; Wang, X.; Zhang, Z.; Zhang, L. Human  
762 neutralizing antibodies elicited by SARS-CoV-2 infection. *Nature* **2020**, *584*, 115-119.
- 763 21. Du, S.; Cao, Y.; Zhu, Q.; Yu, P.; Qi, F.; Wang, G.; Du, X.; Bao, L.; Deng, W.; Zhu, H.; Liu, J.; Nie, J.; Zheng,  
764 Y.; Liang, H.; Liu, R.; Gong, S.; Xu, H.; Yisimayi, A.; Lv, Q.; Wang, B.; He, R.; Han, Y.; Zhao, W.; Bai, Y.; Qu,  
765 Y.; Gao, X.; Ji, C.; Wang, Q.; Gao, N.; Huang, W.; Wang, Y.; Xie, X. S.; Su, X. D.; Xiao, J.; Qin, C. Structurally  
766 Resolved SARS-CoV-2 Antibody Shows High Efficacy in Severely Infected Hamsters and Provides a  
767 Potent Cocktail Pairing Strategy. *Cell* **2020**, *183*, 1013-1023.e13.
- 768 22. Baum, A.; Fulton, B. O.; Wloga, E.; Copin, R.; Pascal, K. E.; Russo, V.; Giordano, S.; Lanza, K.; Negron, N.;  
769 Ni, M.; Wei, Y.; Atwal, G. S.; Murphy, A. J.; Stahl, N.; Yancopoulos, G. D.; Kyratsous, C. A. Antibody



- 770 cocktail to SARS-CoV-2 spike protein prevents rapid mutational escape seen with individual antibodies.  
771 *Science* **2020**, *369*, 1014-1018.
- 772 23. Ju, B.; Zhang, Q.; Ge, J.; Wang, R.; Sun, J.; Ge, X.; Yu, J.; Shan, S.; Zhou, B.; Song, S.; Tang, X.; Lan, J.; Yuan,  
773 J.; Wang, H.; Zhao, J.; Zhang, S.; Wang, Y.; Shi, X.; Liu, L.; Wang, X.; Zhang, Z.; Zhang, L. Human  
774 neutralizing antibodies elicited by SARS-CoV-2 infection. *Nature* **2020**, *584*, 115-119.
- 775 24. Piccoli, L.; Park, Y. J.; Tortorici, M. A.; Czudnochowski, N.; Walls, A. C.; Beltramello, M.; Silacci-Fregni, C.;  
776 Pinto, D.; Rosen, L. E.; Bowen, J. E.; Acton, O. J.; Jaconi, S.; Guarino, B.; Minola, A.; Zatta, F.; Sprugasci, N.;  
777 Bassi, J.; Peter, A.; De Marco, A.; Nix, J. C.; Mele, F.; Jovic, S.; Rodriguez, B. F.; Gupta, S. V.; Jin, F.; Piumatti,  
778 G.; Lo Presti, G.; Pellanda, A. F.; Biggiogero, M.; Tarkowski, M.; Pizzuto, M. S.; Cameroni, E.;  
779 Havenar-Daughton, C.; Smithey, M.; Hong, D.; Lepori, V.; Albanese, E.; Ceschi, A.; Bernasconi, E.; Elzi, L.;  
780 Ferrari, P.; Garzoni, C.; Riva, A.; Snell, G.; Sallusto, F.; Fink, K.; Virgin, H. W.; Lanzavecchia, A.; Corti, D.;  
781 Veesler, D., Mapping Neutralizing and Immunodominant Sites on the SARS-CoV-2 Spike  
782 Receptor-Binding Domain by Structure-Guided High-Resolution Serology. *Cell* **2020**, *183*, 1024-1042.e21.
- 783 25. Ge, J.; Wang, R.; Ju, B.; Zhang, Q.; Sun, J.; Chen, P.; Zhang, S.; Tian, Y.; Shan, S.; Cheng, L.; Zhou, B.; Song,  
784 S.; Zhao, J.; Wang, H.; Shi, X.; Ding, Q.; Liu, L.; Zhang, Z.; Wang, X.; Zhang, L., Antibody neutralization of  
785 SARS-CoV-2 through ACE2 receptor mimicry. *Nat Commun* **2021**, *12*, 250.
- 786 26. Ku, Z.; Xie, X.; Davidson, E.; Ye, X.; Su, H.; Menachery, V. D.; Li, Y.; Yuan, Z.; Zhang, X.; Muruato, A. E.;  
787 AG, I. E.; Tyrell, B.; Doolan, K.; Doranz, B. J.; Wrapp, D.; Bates, P. F.; McLellan, J. S.; Weiss, S. R.; Zhang, N.;  
788 Shi, P. Y.; An, Z. Molecular determinants and mechanism for antibody cocktail preventing SARS-CoV-2  
789 escape. *Nat Commun* **2021**, *12*, 469.
- 790 27. Yuan, M.; Liu, H.; Wu, N. C.; Lee, C. D.; Zhu, X.; Zhao, F.; Huang, D.; Yu, W.; Hua, Y.; Tien, H.; Rogers, T.  
791 F.; Landais, E.; Sok, D.; Jardine, J. G.; Burton, D. R.; Wilson, I. A., Structural basis of a shared antibody  
792 response to SARS-CoV-2. *Science* **2020**, *369*, 1119-1123.
- 793 28. Zhou, D.; Duyvesteyn, H. M. E.; Chen, C. P.; Huang, C. G.; Chen, T. H.; Shih, S. R.; Lin, Y. C.; Cheng, C. Y.;  
794 Cheng, S. H.; Huang, Y. C.; Lin, T. Y.; Ma, C.; Huo, J.; Carrique, L.; Malinauskas, T.; Ruza, R. R.; Shah, P. N.  
795 M.; Tan, T. K.; Rijal, P.; Donat, R. F.; Godwin, K.; Buttigieg, K. R.; Tree, J. A.; Radecke, J.; Paterson, N. G.;  
796 Supasa, P.; Mongkolsapaya, J.; Srean, G. R.; Carroll, M. W.; Gilbert-Jaramillo, J.; Knight, M. L.; James,  
797 W.; Owens, R. J.; Naismith, J. H.; Townsend, A. R.; Fry, E. E.; Zhao, Y.; Ren, J.; Stuart, D. I.; Huang, K. A.  
798 Structural basis for the neutralization of SARS-CoV-2 by an antibody from a convalescent patient. *Nat*  
799 *Struct Mol Biol* **2020**, *27*, 950-958.
- 800 29. Chi, X.; Yan, R.; Zhang, J.; Zhang, G.; Zhang, Y.; Hao, M.; Zhang, Z.; Fan, P.; Dong, Y.; Yang, Y.; Chen, Z.;  
801 Guo, Y.; Li, Y.; Song, X.; Chen, Y.; Xia, L.; Fu, L.; Hou, L.; Xu, J.; Yu, C.; Li, J.; Zhou, Q.; Chen, W. A  
802 neutralizing human antibody binds to the N-terminal domain of the Spike protein of SARS-CoV-2. *Science*  
803 **2020**, *369*, 650-655.
- 804 30. Brouwer, P. J. M.; Caniels, T. G.; van der Straten, K.; Snitselaar, J. L.; Aldon, Y.; Bangaru, S.; Torres, J. L.;  
805 Okba, N. M. A.; Claireaux, M.; Kerster, G.; Bentlage, A. E. H.; van Haaren, M. M.; Guerra, D.; Burger, J. A.;  
806 Schermer, E. E.; Verheul, K. D.; van der Velde, N.; van der Kooi, A.; van Schooten, J.; van Breemen, M. J.;  
807 Bijl, T. P. L.; Slieden, K.; Aartse, A.; Derking, R.; Bontjer, I.; Kootstra, N. A.; Wiersinga, W. J.; Vidarsson, G.;  
808 Haagmans, B. L.; Ward, A. B.; de Bree, G. J.; Sanders, R. W.; van Gils, M. J. Potent neutralizing antibodies  
809 from COVID-19 patients define multiple targets of vulnerability. *Science* **2020**, *369*, 643-650.
- 810 31. Lv, Z.; Deng, Y. Q.; Ye, Q.; Cao, L.; Sun, C. Y.; Fan, C.; Huang, W.; Sun, S.; Sun, Y.; Zhu, L.; Chen, Q.; Wang,  
811 N.; Nie, J.; Cui, Z.; Zhu, D.; Shaw, N.; Li, X. F.; Li, Q.; Xie, L.; Wang, Y.; Rao, Z.; Qin, C. F.; Wang, X.  
812 Structural basis for neutralization of SARS-CoV-2 and SARS-CoV by a potent therapeutic antibody. *Science*  
813 **2020**, *369*, 1505-1509.
- 814 32. Pinto, D.; Park, Y. J.; Beltramello, M.; Walls, A. C.; Tortorici, M. A.; Bianchi, S.; Jaconi, S.; Culap, K.; Zatta,  
815 F.; De Marco, A.; Peter, A.; Guarino, B.; Spreafico, R.; Cameroni, E.; Case, J. B.; Chen, R. E.;  
816 Havenar-Daughton, C.; Snell, G.; Telenti, A.; Virgin, H. W.; Lanzavecchia, A.; Diamond, M. S.; Fink, K.;  
817 Velesler, D.; Corti, D. Cross-neutralization of SARS-CoV-2 by a human monoclonal SARS-CoV antibody.  
818 *Nature* **2020**, *583*, 290-295.
- 819 33. Tortorici, M. A.; Beltramello, M.; Lempp, F. A.; Pinto, D.; Dang, H. V.; Rosen, L. E.; McCallum, M.; Bowen,  
820 J.; Minola, A.; Jaconi, S.; Zatta, F.; De Marco, A.; Guarino, B.; Bianchi, S.; Lauron, E. J.; Tucker, H.; Zhou, J.;  
821 Peter, A.; Havenar-Daughton, C.; Wojcechowskyj, J. A.; Case, J. B.; Chen, R. E.; Kaiser, H.; Montiel-Ruiz,  
822 M.; Meury, M.; Czudnochowski, N.; Spreafico, R.; Dillen, J.; Ng, C.; Sprugasci, N.; Culap, K.; Benigni, F.;  
823 Abdelnabi, R.; Foo, S. C.; Schmid, M. A.; Cameroni, E.; Riva, A.; Gabrieli, A.; Galli, M.; Pizzuto, M. S.;  
824 Neyts, J.; Diamond, M. S.; Virgin, H. W.; Snell, G.; Corti, D.; Fink, K.; Velesler, D. Ultrapotent human  
825 antibodies protect against SARS-CoV-2 challenge via multiple mechanisms. *Science* **2020**, *370*, 950-957.
- 826 34. Asarnow, D.; Wang, B.; Lee, W. H.; Hu, Y.; Huang, C. W.; Faust, B.; Ng, P. M. L.; Ngoh, E. Z. X.;  
827 Bohn, M.; Bulkley, D.; Pizzorno, A.; Ary, B.; Tan, H. C.; Lee, C. Y.; Minhat, R. A.; Terrier, O.;

- 828 Soh, M. K.; Teo, F. J.; Yeap, Y. Y. C.; Seah, S. G. K.; Chan, C. E. Z.; Connelly, E.; Young, N. J.;  
829 Maurer-Stroh, S.; Renia, L.; Hanson, B. J.; Rosa-Calatrava, M.; Manglik, A.; Cheng, Y.; Craik, C. S.;  
830 Wang, C. I., Structural insight into SARS-CoV-2 neutralizing antibodies and modulation of syncytia. *Cell*  
831 **2021**, *184*, 3192-3204.e16.
- 832 35. Hurlburt, N. K.; Seydoux, E.; Wan, Y. H.; Edara, V. V.; Stuart, A. B.; Feng, J.; Suthar, M. S.;  
833 McGuire, A. T.; Stamatakos, L.; Pancera, M., Structural basis for potent neutralization of SARS-CoV-2 and  
834 role of antibody affinity maturation. *Nat Commun* **2020**, *11*, 5413.
- 835 36. Gaebler, C.; Wang, Z.; Lorenzi, J. C. C.; Muecksch, F.; Finkin, S.; Tokuyama, M.; Cho, A.;  
836 Jankovic, M.; Schaefer-Babajew, D.; Oliveira, T. Y.; Cipolla, M.; Viant, C.; Barnes, C. O.; Bram, Y.;  
837 Breton, G.; Hägglöf, T.; Mendoza, P.; Hurley, A.; Turroja, M.; Gordon, K.; Millard, K. G.; Ramos,  
838 V.; Schmidt, F.; Weisblum, Y.; Jha, D.; Tankelevich, M.; Martinez-Delgado, G.; Yee, J.; Patel, R.;  
839 Dizon, J.; Unson-O'Brien, C.; Shimeliovich, I.; Robbiani, D. F.; Zhao, Z.; Gazumyan, A.; Schwartz,  
840 R. E.; Hatzioannou, T.; Bjorkman, P. J.; Mehandru, S.; Bieniasz, P. D.; Caskey, M.; Nussenzweig,  
841 M. C., Evolution of antibody immunity to SARS-CoV-2. *Nature* **2021**, *591*, 639-644.
- 842 37. Starr, T. N.; Greaney, A. J.; Hilton, S. K.; Ellis, D.; Crawford, K. H. D.; Dingens, A. S.; Navarro, M. J.;  
843 Bowen, J. E.; Tortorici, M. A.; Walls, A. C.; King, N. P.; Velesler, D.; Bloom, J. D. Deep Mutational Scanning  
844 of SARS-CoV-2 Receptor Binding Domain Reveals Constraints on Folding and ACE2 Binding. *Cell* **2020**,  
845 *182*, 1295-1310.e20.
- 846 38. Greaney, A. J.; Starr, T. N.; Gilchuk, P.; Zost, S. J.; Binshtein, E.; Loes, A. N.; Hilton, S. K.; Huddleston, J.;  
847 Eguia, R.; Crawford, K. H. D.; Dingens, A. S.; Nargi, R. S.; Sutton, R. E.; Suryadevara, N.; Rothlauf, P. W.;  
848 Liu, Z.; Whelan, S. P. J.; Carnahan, R. H.; Crowe, J. E., Jr.; Bloom, J. D. Complete Mapping of Mutations to  
849 the SARS-CoV-2 Spike Receptor-Binding Domain that Escape Antibody Recognition. *Cell Host Microbe*  
850 **2021**, *29*, 44-57.e9.
- 851 39. Greaney, A. J.; Loes, A. N.; Crawford, K. H. D.; Starr, T. N.; Malone, K. D.; Chu, H. Y.; Bloom, J. D.  
852 Comprehensive mapping of mutations to the SARS-CoV-2 receptor-binding domain that affect  
853 recognition by polyclonal human serum antibodies *Cell Host Microbe* **2021**, *29*, 463-476.e6.
- 854 40. Starr, T. N.; Greaney, A. J.; Addetia, A.; Hannon, W. W.; Choudhary, M. C.; Dingens, A. S.; Li, J.  
855 Z.; Bloom, J. D. Prospective mapping of viral mutations that escape antibodies used to treat COVID-19.  
856 *Science* **2021**, *371*, 850-854.
- 857 41. Greaney, A. J.; Starr, T. N.; Barnes, C. O.; Weisblum, Y.; Schmidt, F.; Caskey, M.; Gaebler, C.;  
858 Cho, A.; Agudelo, M.; Finkin, S.; Wang, Z.; Poston, D.; Muecksch, F.; Hatzioannou, T.; Bieniasz,  
859 P. D.; Robbiani, D. F.; Nussenzweig, M. C.; Bjorkman, P. J.; Bloom, J. D., Mapping mutations to the  
860 SARS-CoV-2 RBD that escape binding by different classes of antibodies. *Nat Commun* **2021**, *12*, 4196.
- 861 42. Starr, T. N.; Czudnochowski, N.; Liu, Z.; Zatta, F.; Park, Y. J.; Addetia, A.; Pinto, D.; Beltramello, M.;  
862 Hernandez, P.; Greaney, A. J.; Marzi, R.; Glass, W. G.; Zhang, I.; Dingens, A. S.; Bowen, J. E.; Tortorici, M.  
863 A.; Walls, A. C.; Wojcechowskyj, J. A.; De Marco, A.; Rosen, L. E.; Zhou, J.; Montiel-Ruiz, M.; Kaiser, H.;  
864 Dillen, J. R.; Tucker, H.; Bassi, J.; Silacci-Fregni, C.; Housley, M. P.; di Iulio, J.; Lombardo, G.; Agostini, M.;  
865 Sprugasci, N.; Culap, K.; Jaconi, S.; Meury, M.; Dellota, E., Jr.; Abdelnabi, R.; Foo, S. C.; Cameroni, E.;  
866 Stumpf, S.; Croll, T. I.; Nix, J. C.; Havenar-Daughton, C.; Piccoli, L.; Benigni, F.; Neyts, J.; Telenti, A.;  
867 Lempp, F. A.; Pizzuto, M. S.; Chodera, J. D.; Hebner, C. M.; Virgin, H. W.; Whelan, S. P. J.; Velesler, D.;  
868 Corti, D.; Bloom, J. D.; Snell, G., SARS-CoV-2 RBD antibodies that maximize breadth and resistance to  
869 escape. *Nature* **2021**, *597*, 97-102.
- 870 43. Korber, B.; Fischer, W. M.; Gnanakaran, S.; Yoon, H.; Theiler, J.; Abfalterer, W.; Hengartner, N.;  
871 Giorgi, E. E.; Bhattacharya, T.; Foley, B.; Hastie, K. M.; Parker, M. D.; Partridge, D. G.; Evans, C.  
872 M.; Freeman, T. M.; de Silva, T. I.; McDanal, C.; Perez, L. G.; Tang, H.; Moon-Walker, A.;  
873 Whelan, S. P.; LaBranche, C. C.; Saphire, E. O.; Montefiori, D. C. Tracking changes in SARS-CoV-2  
874 Spike: Evidence that D614G increases infectivity of the COVID-19 virus. *Cell* **2020**, *182*, 812-827.e19.
- 875 44. Plante, J. A.; Liu, Y.; Liu, J.; Xia, H.; Johnson, B. A.; Lokugamage, K. G.; Zhang, X.; Muruato, A.  
876 E.; Zou, J.; Fontes-Garfias, C. R.; Mirchandani, D.; Scharton, D.; Bilello, J. P.; Ku, Z.; An, Z.;  
877 Kalveram, B.; Freiberg, A. N.; Menachery, V. D.; Xie, X.; Plante, K. S.; Weaver, S. C.; Shi, P. Y. Spike  
878 mutation D614G alters SARS-CoV-2 fitness. *Nature* **2021**, *592*, 116-121.
- 879 45. Hou, Y. J.; Chiba, S.; Halfmann, P.; Ehre, C.; Kuroda, M.; Dinnon, K. H., 3rd; Leist, S. R.; Schäfer,  
880 A.; Nakajima, N.; Takahashi, K.; Lee, R. E.; Mascenik, T. M.; Graham, R.; Edwards, C. E.; Tse, L.  
881 V.; Okuda, K.; Markmann, A. J.; Bartelt, L.; de Silva, A.; Margolis, D. M.; Boucher, R. C.; Randell,  
882 S. H.; Suzuki, T.; Gralinski, L. E.; Kawaoka, Y.; Baric, R. S. SARS-CoV-2 D614G variant exhibits  
883 efficient replication ex vivo and transmission in vivo. *Science* **2020**, *370*, 1464-1468.
- 884 46. Jackson, C. B.; Zhang, L.; Farzan, M.; Choe, H., Functional importance of the D614G mutation in the  
885 SARS-CoV-2 spike protein. *Biochem Biophys Res Commun* **2021**, *538*, 108-115.

- 886 47. Yurkovetskiy, L.; Wang, X.; Pascal, K. E.; Tomkins-Tinch, C.; Nyalile, T. P.; Wang, Y.; Baum, A.;  
887 Diehl, W. E.; Dauphin, A.; Carbone, C.; Veinotte, K.; Egri, S. B.; Schaffner, S. F.; Lemieux, J. E.;  
888 Munro, J. B.; Rafique, A.; Barve, A.; Sabeti, P. C.; Kyratsous, C. A.; Dudkina, N. V.; Shen, K.;  
889 Luban, J. Structural and functional analysis of the D614G SARS-CoV-2 spike protein variant. *Cell* **2020**, *183*,  
890 739-751.e8.
- 891 48. Gobeil, S. M.; Janowska, K.; McDowell, S.; Mansouri, K.; Parks, R.; Manne, K.; Stalls, V.; Kopp,  
892 M. F.; Henderson, R.; Edwards, R. J.; Haynes, B. F.; Acharya, P. D614G Mutation Alters SARS-CoV-2  
893 Spike Conformation and Enhances Protease Cleavage at the S1/S2 Junction. *Cell Rep* **2021**, *34*, 108630.
- 894 49. Weissman, D.; Alameh, M. G.; de Silva, T.; Collini, P.; Hornsby, H.; Brown, R.; LaBranche, C. C.;  
895 Edwards, R. J.; Sutherland, L.; Santra, S.; Mansouri, K.; Gobeil, S.; McDanal, C.; Pardi, N.;  
896 Hengartner, N.; Lin, P. J. C.; Tam, Y.; Shaw, P. A.; Lewis, M. G.; Boesler, C.; Şahin, U.; Acharya,  
897 P.; Haynes, B. F.; Korber, B.; Montefiori, D. C. D614G Spike Mutation Increases SARS CoV-2  
898 Susceptibility to Neutralization. *Cell Host Microbe* **2021**, *29*, 23-31.
- 899 50. Zhang, L.; Jackson, C. B.; Mou, H.; Ojha, A.; Peng, H.; Quinlan, B. D.; Rangarajan, E. S.; Pan, A.;  
900 Vanderheiden, A.; Suthar, M. S.; Li, W.; Izard, T.; Rader, C.; Farzan, M.; Choe, H., SARS-CoV-2  
901 spike-protein D614G mutation increases virion spike density and infectivity. *Nat Commun* **2020**, *11*, 6013.
- 902 51. Zhang, J.; Cai, Y.; Xiao, T.; Lu, J.; Peng, H.; Sterling, S. M.; Walsh, R. M.; Rits-Volloch, S.; Sliz,  
903 P.; Chen, B., Structural impact on SARS-CoV-2 spike protein by D614G substitution. *Science* **2021**, *372*,  
904 525-530.
- 905 52. Fiorentini, S.; Messali, S.; Zani, A.; Caccuri, F.; Giovanetti, M.; Ciccozzi, M.; Caruso, A., First  
906 detection of SARS-CoV-2 spike protein N501 mutation in Italy in August, 2020. *Lancet Infect. Dis.* **2021**, *21*,  
907 e147.
- 908 53. Davies NG, Abbott S, Barnard RC, Jarvis CI, Kucharski AJ, Munday JD, Pearson CAB, Russell TW, Tully  
909 DC, Washburne AD, Wenseleers T, Gimma A, Waites W, Wong KLM, van Zandvoort K, Silverman JD;  
910 CMMID COVID-19 Working Group; COVID-19 Genomics UK (COG-UK) Consortium, Diaz-Ordaz K,  
911 Keogh R, Eggo RM, Funk S, Jit M, Atkins KE, Edmunds WJ. Estimated transmissibility and impact of  
912 SARS-CoV-2 lineage B.1.1.7 in England. *Science*. **2021**, *372*, eabg3055.
- 913 54. Davies, N. G.; Jarvis, C. I.; Edmunds, W. J.; Jewell, N. P.; Diaz-Ordaz, K.; Keogh, R. H., Increased  
914 mortality in community-tested cases of SARS-CoV-2 lineage B.1.1.7. *Nature* **2021**, *593*, 270-274.
- 915 55. Muik, A.; Wallisch, A. K.; Sanger, B.; Swanson, K. A.; Muhl, J.; Chen, W.; Cai, H.; Maurus, D.;  
916 Sarkar, R.; Tureci, . O.; Dormitzer, P. R.; Şahin, U. Neutralization of SARS-CoV-2 lineage B.1.1.7  
917 pseudovirus by BNT162b2 vaccine-elicited human sera. *Science*. **2021**, *371*, 1152-1153.
- 918 56. Tegally, H.; Wilkinson, E.; Giovanetti, M.; Iranzadeh, A.; Fonseca, V.; Giandhari, J.; Doolabh, D.;  
919 Pillay, S.; San, E. J.; Msomi, N.; Mlisana, K.; von Gottberg, A.; Walaza, S.; Allam, M.; Ismail, A.;  
920 Mohale, T.; Glass, A. J.; Engelbrecht, S.; Van Zyl, G.; Preiser, W.; Petruccione, F.; Sigal, A.;  
921 Hardie, D.; Marais, G.; Hsiao, N. Y.; Korsman, S.; Davies, M. A.; Tyers, L.; Mudau, I.; York, D.;  
922 Maslo, C.; Goedhals, D.; Abrahams, S.; Laguda-Akingba, O.; Alisoltani-Dehkordi, A.; Godzik, A.;  
923 Wibmer, C. K.; Sewell, B. T.; Lourenço, J.; Alcantara, L. C. J.; Kosakovsky Pond, S. L.; Weaver, S.;  
924 Martin, D.; Lessells, R. J.; Bhiman, J. N.; Williamson, C.; de Oliveira, T., Detection of a SARS-CoV-2  
925 variant of concern in South Africa. *Nature* **2021**, *592*, 438-443.
- 926 57. Tegally, H.; Wilkinson, E.; Lessells, R. J.; Giandhari, J.; Pillay, S.; Msomi, N.; Mlisana, K.;  
927 Bhiman, J. N.; von Gottberg, A.; Walaza, S.; Fonseca, V.; Allam, M.; Ismail, A.; Glass, A. J.;  
928 Engelbrecht, S.; Van Zyl, G.; Preiser, W.; Williamson, C.; Petruccione, F.; Sigal, A.; Gazy, I.;  
929 Hardie, D.; Hsiao, N. Y.; Martin, D.; York, D.; Goedhals, D.; San, E. J.; Giovanetti, M.; Lourenço,  
930 J.; Alcantara, L. C. J.; de Oliveira, T., Sixteen novel lineages of SARS-CoV-2 in South Africa. *Nat. Med.*  
931 **2021**, *27*, 440-446.
- 932 58. Wu, K.; Werner, A. P.; Moliva, J. I.; Koch, M.; Choi, A.; Stewart-Jones, G. B. E.; Bennett, H.;  
933 Boyoglu-Barnum, S.; Shi, W.; Graham, B. S.; Carfi, A.; Corbett, K. S.; Seder, R. A.; Edwards, D. K.  
934 mRNA-1273 vaccine induces neutralizing antibodies against spike mutants from global SARS-CoV-2  
935 variants. *bioRxiv* **2021** doi: 10.1101/2021.01.25.427948.
- 936 59. Wang, Z.; Schmidt, F.; Weisblum, Y.; Muecksch, F.; Barnes, C. O.; Finkin, S.; Schaefer-Babajew,  
937 D.; Cipolla, M.; Gaebler, C.; Lieberman, J. A.; Oliveira, T. Y.; Yang, Z.; Abernathy, M. E.;  
938 Huey-Tubman, K. E.; Hurley, A.; Turroja, M.; West, K. A.; Gordon, K.; Millard, K. G.; Ramos, V.;  
939 Silva, J. D.; Xu, J.; Colbert, R. A.; Patel, R.; Dizon, J.; Unson-O'Brien, C.; Shimeliovich, I.;  
940 Gazumyan, A.; Caskey, M.; Bjorkman, P. J.; Casellas, R.; Hatziioannou, T.; Bieniasz, P. D.;  
941 Nussenzweig, M. C., mRNA vaccine-elicited antibodies to SARS-CoV-2 and circulating variants. *Nature*  
942 **2021** *592*, 616-622.

- 943 60. De Gasparo, R.; Pedotti, M.; Simonelli, L.; Nickl, P.; Muecksch, F.; Cassaniti, I.; Percivalle, E.;  
944 Lorenzi, J. C. C.; Mazzola, F.; Magri, D.; Michalckikova, T.; Haviernik, J.; Honig, V.; Mrazkova, B.;  
945 Polakova, N.; Fortova, A.; Tureckova, J.; Iatsiuk, V.; Di Girolamo, S.; Palus, M.; Zudova, D.;  
946 Bednar, P.; Bukova, I.; Bianchini, F.; Mehn, D.; Nencka, R.; Strakova, P.; Pavlis, O.; Rozman, J.;  
947 Gioria, S.; Sammartino, J. C.; Giardina, F.; Gaiarsa, S.; Pan-Hammarström, Q.; Barnes, C. O.;  
948 Bjorkman, P. J.; Calzolari, L.; Piralla, A.; Baldanti, F.; Nussenzweig, M. C.; Bieniasz, P. D.;  
949 Hatzioannou, T.; Prochazka, J.; Sedlacek, R.; Robbiani, D. F.; Ruzek, D.; Varani, L., Bispecific IgG  
950 neutralizes SARS-CoV-2 variants and prevents escape in mice. *Nature* **2021**, *593*, 424-428.
- 951 61. Cai, Y.; Zhang, J.; Xiao, T.; Lavine, C. L.; Rawson, S.; Peng, H.; Zhu, H.; Anand, K.; Tong, P.; Gautam, A.;  
952 Lu, S.; Sterling, S. M.; Walsh, R. M., Jr.; Rits-Volloch, S.; Lu, J.; Wesemann, D. R.; Yang, W.; Seaman, M. S.;  
953 Chen, B., Structural basis for enhanced infectivity and immune evasion of SARS-CoV-2 variants. *Science*  
954 **2021**, *373*, 642-648.
- 955 62. McCallum, M.; Bassi, J.; De Marco, A.; Chen, A.; Walls, A. C.; Di Iulio, J.; Tortorici, M. A.; Navarro, M. J.;  
956 Silacci-Fregni, C.; Saliba, C.; Sprouse, K. R.; Agostini, M.; Pinto, D.; Culap, K.; Bianchi, S.; Jaconi, S.;  
957 Cameroni, E.; Bowen, J. E.; Tilles, S. W.; Pizzuto, M. S.; Guastalla, S. B.; Bona, G.; Pellanda, A. F.; Garzoni,  
958 C.; Van Voorhis, W. C.; Rosen, L. E.; Snell, G.; Telenti, A.; Virgin, H. W.; Piccoli, L.; Corti, D.; Veessler, D.,  
959 SARS-CoV-2 immune evasion by the B.1.427/B.1.429 variant of concern. *Science* **2021**, *373*, 648-654.
- 960 63. Gobeil, S. M.; Janowska, K.; McDowell, S.; Mansouri, K.; Parks, R.; Stalls, V.; Kopp, M. F.; Manne, K.; Li, D.;  
961 Wiehe, K.; Saunders, K. O.; Edwards, R. J.; Korber, B.; Haynes, B. F.; Henderson, R.; Acharya, P., Effect of  
962 natural mutations of SARS-CoV-2 on spike structure, conformation, and antigenicity. *Science* **2021**, *373*,  
963 eabi6226.
- 964 64. Yuan, M.; Huang, D.; Lee, C. D.; Wu, N. C.; Jackson, A. M.; Zhu, X.; Liu, H.; Peng, L.; van Gils, M. J.;  
965 Sanders, R. W.; Burton, D. R.; Reincke, S. M.; Prüss, H.; Kreye, J.; Nemazee, D.; Ward, A. B.; Wilson, I. A.,  
966 Structural and functional ramifications of antigenic drift in recent SARS-CoV-2 variants. *Science* **2021**, *373*,  
967 818-823.
- 968 65. Wang, L.; Zhou, T.; Zhang, Y.; Yang, E. S.; Schramm, C. A.; Shi, W.; Pegu, A.; Oloniniyi, O. K.; Henry, A.  
969 R.; Darko, S.; Narpala, S. R.; Hatcher, C.; Martinez, D. R.; Tsybovsky, Y.; Phung, E.; Abiona, O. M.; Antia,  
970 A.; Cale, E. M.; Chang, L. A.; Choe, M.; Corbett, K. S.; Davis, R. L.; DiPiazza, A. T.; Gordon, I. J.; Hait, S. H.;  
971 Hermanus, T.; Kgagudi, P.; Laboune, F.; Leung, K.; Liu, T.; Mason, R. D.; Nazzari, A. F.; Novik, L.;  
972 O'Connell, S.; O'Dell, S.; O'Neil, A. S.; Schmidt, S. D.; Stephens, T.; Stringham, C. D.; Talana, C. A.; Teng, I. T.;  
973 Wagner, D. A.; Widge, A. T.; Zhang, B.; Roederer, M.; Ledgerwood, J. E.; Ruckwardt, T. J.; Gaudinski, M.  
974 R.; Moore, P. L.; Doria-Rose, N. A.; Baric, R. S.; Graham, B. S.; McDermott, A. B.; Douek, D. C.; Kwong, P.  
975 D.; Mascola, J. R.; Sullivan, N. J.; Misasi, J., Ultrapotent antibodies against diverse and highly transmissible  
976 SARS-CoV-2 variants. *Science* **2021**, *373*, eabh1766. 2
- 977 66. Tortorici, M. A.; Czudnochowski, N.; Starr, T. N.; Marzi, R.; Walls, A. C.; Zatta, F.; Bowen, J. E.; Jaconi, S.;  
978 Di Iulio, J.; Wang, Z.; De Marco, A.; Zepeda, S. K.; Pinto, D.; Liu, Z.; Beltramello, M.; Bartha, I.; Housley, M.  
979 P.; Lempp, F. A.; Rosen, L. E.; Dellota, E., Jr.; Kaiser, H.; Montiel-Ruiz, M.; Zhou, J.; Addetia, A.; Guarino,  
980 B.; Culap, K.; Sprugasci, N.; Saliba, C.; Vetti, E.; Giacchetto-Sasselli, I.; Fregni, C. S.; Abdelnabi, R.; Foo, S.  
981 C.; Havenar-Daughton, C.; Schmid, M. A.; Benigni, F.; Cameroni, E.; Neyts, J.; Telenti, A.; Virgin, H. W.;  
982 Whelan, S. P. J.; Snell, G.; Bloom, J. D.; Corti, D.; Veessler, D.; Pizzuto, M. S., Broad sarbecovirus  
983 neutralization by a human monoclonal antibody. *Nature* **2021**, *597*, 103-108.
- 984 67. Dong, J.; Zost, S. J.; Greaney, A. J.; Starr, T. N.; Dingens, A. S.; Chen, E. C.; Chen, R. E.; Case, J. B.; Sutton, R.  
985 E.; Gilchuk, P.; Rodriguez, J.; Armstrong, E.; Gainza, C.; Nargi, R. S.; Binshtein, E.; Xie, X.; Zhang, X.; Shi, P.  
986 Y.; Logue, J.; Weston, S.; McGrath, M. E.; Frieman, M. B.; Brady, T.; Tuffy, K. M.; Bright, H.; Loo, Y. M.;  
987 McTamney, P. M.; Esser, M. T.; Carnahan, R. H.; Diamond, M. S.; Bloom, J. D.; Crowe, J. E., Jr., Genetic and  
988 structural basis for SARS-CoV-2 variant neutralization by a two-antibody cocktail. *Nat Microbiol* **2021**, *6*,  
989 1233-1244.
- 990 68. Cho, H.; Gonzales-Wartz, K. K.; Huang, D.; Yuan, M.; Peterson, M.; Liang, J.; Beutler, N.; Torres, J. L.;  
991 Cong, Y.; Postnikova, E.; Bangaru, S.; Talana, C. A.; Shi, W.; Yang, E. S.; Zhang, Y.; Leung, K.; Wang, L.;  
992 Peng, L.; Skinner, J.; Li, S.; Wu, N. C.; Liu, H.; Dacon, C.; Moyer, T.; Cohen, M.; Zhao, M.; Lee, F. E.;  
993 Weinberg, R. S.; Douagi, I.; Gross, R.; Schmaljohn, C.; Pegu, A.; Mascola, J. R.; Holbrook, M.; Nemazee, D.;  
994 Rogers, T. F.; Ward, A. B.; Wilson, I. A.; Crompton, P. D.; Tan, J., Bispecific antibodies targeting distinct  
995 regions of the spike protein potentially neutralize SARS-CoV-2 variants of concern. *Sci Transl Med* **2021**, *13*,  
996 eabj5413.
- 997 69. Li, T.; Xue, W.; Zheng, Q.; Song, S.; Yang, C.; Xiong, H.; Zhang, S.; Hong, M.; Zhang, Y.; Yu, H.; Sun, H.;  
998 Huang, Y.; Deng, T.; Chi, X.; Li, J.; Wang, S.; Zhou, L.; Chen, T.; Wang, Y.; Cheng, T.; Zhang, T.; Yuan, Q.;  
999 Zhao, Q.; Zhang, J.; McLellan, J. S.; Zhou, Z. H.; Zhang, Z.; Li, S.; Gu, Y.; Xia, N., Cross-neutralizing  
1000 antibodies bind a SARS-CoV-2 cryptic site and resist circulating variants. *Nat Commun* **2021**, *12*, 5652.

- 1001 70. Cai, Y.; Zhang, J.; Xiao, T.; Lavine, C. L.; Rawson, S.; Peng, H.; Zhu, H.; Anand, K.; Tong, P.; Gautam, A.;  
1002 Lu, S.; Sterling, S. M.; Walsh, R. M., Jr.; Rits-Volloch, S.; Lu, J.; Wesemann, D. R.; Yang, W.; Seaman, M. S.;  
1003 Chen, B., Structural basis for enhanced infectivity and immune evasion of SARS-CoV-2 variants. *Science*  
1004 **2021**, *373*, 642-648.
- 1005 71. Yang, T.J.; Yu, P.Y.; Chang, Y.C.; Liang, K.H.; Tso, H.C.; Ho, M.R.; Chen, W.Y.; Lin, H.T.; Wu, H.C.;  
1006 Hsu, S.D. Effect of SARS-CoV-2 B.1.1.7 mutations on spike protein structure and function. *Nat Struct Mol*  
1007 *Biol.* **2021**, *28*, 731-739.
- 1008 72. Yang, T.J.; Yu, P.Y.; Chang, Y.C.; Chang, N.E.; Tsai, Y.X.; Liang, K.H.; Draczkowski, P.; Lin, B.;  
1009 Wang, Y.S.; Chien, Y.C.; Khoo, K.H.; Wu, H.C.; Hsu, S.D. Structure-activity relationships of B.1.617  
1010 and other SARS-CoV-2 spike variants. *bioRxiv* **2021** doi: <https://doi.org/10.1101/2021.09.12.459978>.
- 1011 73. Ramanathan M, Ferguson ID, Miao W, Khavari PA. SARS-CoV-2 B.1.1.7 and B.1.351 spike variants bind  
1012 human ACE2 with increased affinity. *Lancet Infect Dis.* **2021**, *21*, 1070.
- 1013 74. Barton MI, MacGowan SA, Kutuzov MA, Dushek O, Barton GJ, van der Merwe PA. Effects of common  
1014 mutations in the SARS-CoV-2 Spike RBD and its ligand, the human ACE2 receptor on binding affinity and  
1015 kinetics. *Elife* **2021**, *10*, e70658.
- 1016 75. McCormick KD, Jacobs JL, Mellors JW. The emerging plasticity of SARS-CoV-2. *Science* **2021**, *371*,  
1017 1306-1308.
- 1018 76. Moyo-Gwete, T.; Madzivhandila, M.; Makhado, Z.; Ayres, F.; Mhlanga, D.; Oosthuysen, B.;  
1019 Lambson, B. E.; Kgagudi, P.; Tegally, H.; Iranzadeh, A.; Doolabh, D.; Tyers, L.; Chinhoyi, L. R.;  
1020 Mennen, M.; Skelem, S.; Marais, G.; Wibmer, C. K.; Bhiman, J. N.; Ueckermann, V.; Rossouw, T.;  
1021 Boswell, M.; de Oliveira, T.; Williamson, C.; Burgers, W. A.; Ntusi, N.; Morris, L.; Moore, P. L.,  
1022 Cross-Reactive Neutralizing Antibody Responses Elicited by SARS-CoV-2 501Y.V2 (B.1.351). *N. Engl. J.*  
1023 *Med.* **2021**, *384*, 2161-2163.
- 1024 77. Planas, D.; Bruel, T.; Grzelak, L.; Guivel-Benhassine, F.; Staropoli, I.; Porrot, F.; Planchais, C.;  
1025 Buchrieser, J.; Rajah, M. M.; Bishop, E.; Albert, M.; Donati, F.; Prot, M.; Behillil, S.; Enouf, V.;  
1026 Maquart, M.; Smati-Lafarge, M.; Varon, E.; Schortgen, F.; Yahyaoui, L.; Gonzalez, M.; De Sèze, J.;  
1027 Péré, H.; Veyer, D.; Sève, A.; Simon-Lorière, E.; Fafi-Kremer, S.; Stefic, K.; Mouquet, H.;  
1028 Hocqueloux, L.; van der Werf, S.; Prazuck, T.; Schwartz, O., Sensitivity of infectious SARS-CoV-2  
1029 B.1.1.7 and B.1.351 variants to neutralizing antibodies. *Nat. Med.* **2021**, *27*, 917-924.
- 1030 78. Voloch, C. M.; da Silva Francisco, R., Jr.; de Almeida, L. G. P.; Cardoso, C. C.; Brustolini, O. J.;  
1031 Gerber, A. L.; Guimarães, A. P. C.; Mariani, D.; da Costa, R. M.; Ferreira, O. C., Jr.; Frauches, T. S.;  
1032 de Mello, C. M. B.; Leitão, I. C.; Galliez, R. M.; Faffe, D. S.; Castiñeiras, T.; Tanuri, A.; de  
1033 Vasconcelos, A. T. R., Genomic characterization of a novel SARS-CoV-2 lineage from Rio de Janeiro, Brazil.  
1034 *J. Virol.* **2021**, *95*, e00119-e00121.
- 1035 79. Chen, R. E.; Winkler, E. S.; Case, J. B.; Aziati, I. D.; Bricker, T. L.; Joshi, A.; Darling, T. L.; Ying, B.;  
1036 Errico, J. M.; Shrihari, S.; VanBlargan, L. A.; Xie, X.; Gilchuk, P.; Zost, S. J.; Droit, L.; Liu, Z.;  
1037 Stumpf, S.; Wang, D.; Handley, S. A.; Stine, W. B., Jr.; Shi, P. Y.; Davis-Gardner, M. E.; Suthar, M.  
1038 S.; Knight, M. G.; Andino, R.; Chiu, C. Y.; Ellebedy, A. H.; Fremont, D. H.; Whelan, S. P. J.;  
1039 Crowe, J. E., Jr.; Purcell, L.; Corti, D.; Boon, A. C. M.; Diamond, M. S., In vivo monoclonal antibody  
1040 efficacy against SARS-CoV-2 variant strains. *Nature* **2021**, *596*, 103-108.
- 1041 80. Yin V, Lai SH, Caniels TG, Brouwer PJM, Brinkkemper M, Aldon Y, Liu H, Yuan M, Wilson IA, Sanders  
1042 RW, van Gils MJ, Heck AJR. Probing Affinity, Avidity, Anticooperativity, and Competition in Antibody  
1043 and Receptor Binding to the SARS-CoV-2 Spike by Single Particle Mass Analyses. *ACS Cent Sci.* **2021**, *7*,  
1044 1863-1873.
- 1045 81. Gur, M.; Taka, E.; Yilmaz, S. Z.; Kilinc, C.; Aktas, U.; Golcuk, M. Conformational transition of SARS-CoV-2  
1046 spike glycoprotein between its closed and open states. *J Chem Phys* **2020**, *153*, 075101.
- 1047 82. Wang, Y.; Liu, M.; Gao, J. Enhanced receptor binding of SARS-CoV-2 through networks of  
1048 hydrogen-bonding and hydrophobic interactions. *Proc. Natl. Acad. Sci. U. S. A.* **2020**, *117*, 13967-13974.
- 1049 83. Woo, H.; Park, S. J.; Choi, Y. K.; Park, T.; Tanveer, M.; Cao, Y.; Kern, N. R.; Lee, J.; Yeom, M. S.; Croll, T. I.;  
1050 Seok, C.; Im, W., Developing a Fully Glycosylated Full-Length SARS-CoV-2 Spike Protein Model in a Viral  
1051 Membrane. *J. Phys. Chem. B* **2020**, *124*, 7128-7137.
- 1052 84. Casalino, L.; Gaieb, Z.; Goldsmith, J. A.; Hjorth, C. K.; Dommer, A. C.; Harbison, A. M.; Fogarty, C. A.;  
1053 Barros, E. P.; Taylor, B. C.; McLellan, J. S.; Fadda, E.; Amaro, R. E., Beyond Shielding: The Roles of Glycans  
1054 in the SARS-CoV-2 Spike Protein. *ACS Cent. Sci.* **2020**, *6*, 1722-1734.
- 1055 85. Yu, A.; Pak, A. J.; He, P.; Monje-Galvan, V.; Casalino, L.; Gaieb, Z.; Dommer, A. C.; Amaro, R. E.; Voth, G.  
1056 A. A multiscale coarse-grained model of the SARS-CoV-2 virion. *Biophys J* **2021**, *120*, 1097-1104.



- 1057 86. Sikora, M.; von Bülow, S.; Blanc, F. E. C.; Gecht, M.; Covino, R.; Hummer, G., Computational epitope map  
1058 of SARS-CoV-2 spike protein. *PLoS Comput. Biol.* **2021**, *17*, e1008790.
- 1059 87. Brielle, E. S.; Schneidman-Duhovny, D.; Linial, M. The SARS-CoV-2 exerts a distinctive strategy for  
1060 interacting with the ACE2 human receptor. *Viruses* **2020**, *12*, 497.
- 1061 88. Ghorbani, M.; Brooks, B. R.; Klauda, J. B. Critical Sequence Hotspots for Binding of Novel Coronavirus to  
1062 Angiotensin Converter Enzyme as Evaluated by Molecular Simulations. *J. Phys. Chem. B.* **2020**, *124*,  
1063 10034-10047.
- 1064 89. Taka, E.; Yilmaz, S.Z.; Golcuk, M.; Kilinc, C.; Aktas, U.; Yildiz, A.; Gur, M. Critical Interactions between  
1065 the SARS-CoV-2 Spike Glycoprotein and the Human ACE2 Receptor. *J. Phys. Chem. B.* **2021**, *125*,  
1066 5537-5548.
- 1067 90. Fernández, A. Structural Impact of Mutation D614G in SARS-CoV-2 Spike Protein: Enhanced Infectivity  
1068 and Therapeutic Opportunity. *ACS Med Chem Lett* **2020**, *11*, 1667-1670.
- 1069 91. Luan, B.; Wang, H.; Huynh, T. Enhanced binding of the N501Y-mutated SARS-CoV-2 spike protein to  
1070 the human ACE2 receptor: insights from molecular dynamics simulations. *FEBS Lett* **2021**, *595*, 1454-1461.
- 1071 92. Zimmerman, M. I.; Porter, J. R.; Ward, M. D.; Singh, S.; Vithani, N.; Meller, A.; Mallimadugula, U. L.;  
1072 Kuhn, C. E.; Borowsky, J. H.; Wiewiora, R. P., SARS-CoV-2 simulations go exascale to predict dramatic  
1073 spike opening and cryptic pockets across the proteome. *Nat Chem* **2021**, *13*, 651-659.
- 1074 93. Fatihi, S.; Rathore, S.; Pathak, A.K.; Gahlot, D.; Mukerji, M.; Jatana, N.; Thukral, L. A rigorous framework  
1075 for detecting SARS-CoV-2 spike protein mutational ensemble from genomic and structural features. *Curr*  
1076 *Res Struct Biol.* **2021**, *3*, 290-300.
- 1077 94. Ray, D.; Le, L.; Andricioaei, I. Distant residues modulate conformational opening in SARS-CoV-2 spike  
1078 protein. *Proc Natl Acad Sci U S A* **2021**, *118*, e2100943118.
- 1079 95. Fallon, L.; Belfon, K. A. A.; Raguette, L.; Wang, Y.; Stepanenko, D.; Cuomo, A.; Guerra, J.; Budhan, S.;  
1080 Varghese, S.; Corbo, C. P.; et al. Free Energy Landscapes from SARS-CoV-2 Spike Glycoprotein  
1081 Simulations Suggest that RBD Opening Can Be Modulated via Interactions in an Allosteric Pocket. *J Am*  
1082 *Chem Soc* **2021**, *143*, 11349-11360.
- 1083 96. Mansbach, R. A.; Chakraborty, S.; Nguyen, K.; Montefiori, D. C.; Korber, B.; Gnanakaran, S. The  
1084 SARS-CoV-2 Spike variant D614G favors an open conformational state. *Sci Adv* **2021**, *7*, eabf3671.
- 1085 97. Teruel, N.; Mailhot, O.; Najmanovich, R. J. Modelling conformational state dynamics and its role on  
1086 infection for SARS-CoV-2 Spike protein variants. *PLoS Comput Biol* **2021**, *17*, e1009286.
- 1087 98. Verkhivker, G.M. Coevolution, dynamics and allostery conspire in shaping cooperative binding and  
1088 signal transmission of the SARS-CoV-2 spike protein with human angiotensin-converting enzyme 2. *Int.*  
1089 *J. Mol. Sci.* **2020**, *21*, 8268.
- 1090 99. Verkhivker, G.M. Molecular simulations and network modeling reveal an allosteric signaling in the  
1091 SARS-CoV-2 spike proteins. *J. Proteome Res.* **2020**, *19*, 4587-4608.
- 1092 100. Verkhivker, G. M.; Di Paola, L., Dynamic Network Modeling of Allosteric Interactions and  
1093 Communication Pathways in the SARS-CoV-2 Spike Trimer Mutants: Differential Modulation of  
1094 Conformational Landscapes and Signal Transmission via Cascades of Regulatory Switches. *J Phys. Chem.*  
1095 *B.* **2021**, *125*, 850-873.
- 1096 101. Verkhivker, G.M.; Di Paola, L. Integrated Biophysical Modeling of the SARS-CoV-2 Spike Protein  
1097 Binding and Allosteric Interactions with Antibodies. *J. Phys. Chem. B.* **2021**, *125*, 4596-4619.
- 1098 102. Verkhivker, G.M.; Agajanian, S.; Oztas, D.Y.; Gupta, G. Comparative Perturbation-Based Modeling of the  
1099 SARS-CoV-2 Spike Protein Binding with Host Receptor and Neutralizing Antibodies: Structurally  
1100 Adaptable Allosteric Communication Hotspots Define Spike Sites Targeted by Global Circulating  
1101 Mutations. *Biochemistry* **2021**, *60*, 1459-1484.
- 1102 103. Verkhivker, G.M.; Agajanian, S.; Oztas, D.Y.; Gupta, G. Dynamic Profiling of Binding and Allosteric  
1103 Propensities of the SARS-CoV-2 Spike Protein with Different Classes of Antibodies: Mutational and  
1104 Perturbation-Based Scanning Reveals the Allosteric Duality of Functionally Adaptable Hotspots. *J Chem*  
1105 *Theory Comput.* **2021**, *17*, 4578-4598.
- 1106 104. Verkhivker, G.M.; Agajanian, S.; Oztas, D.Y.; Gupta, G. Computational analysis of protein stability and  
1107 allosteric interaction networks in distinct conformational forms of the SARS-CoV-2 spike D614G mutant:  
1108 reconciling functional mechanisms through allosteric model of spike regulation. *J Biomol Struct Dyn.* **2021**,  
1109 1-18.

- 1110 105. Verkhivker, G.M.; Agajanian, S.; Oztas, D.Y.; Gupta, G. Landscape-Based Mutational Sensitivity  
1111 Cartography and Network Community Analysis of the SARS-CoV-2 Spike Protein Structures: Quantifying  
1112 Functional Effects of the Circulating D614G Variant. *ACS Omega* **2021**, *6*, 16216-16233.
- 1113 106. Arantes, P. R.; Saha, A.; Palermo, G., Fighting COVID-19 Using Molecular Dynamics Simulations. *ACS*  
1114 *Cent. Sci.* **2020**, *6*, 1654-1656.
- 1115 107. Pettersen, E. F.; Goddard, T. D.; Huang, C. C.; Meng, E. C.; Couch, G. S.; Croll, T. I.; Morris, J. H.; Ferrin, T.  
1116 E. UCSF ChimeraX: Structure visualization for researchers, educators, and developers. *Protein Sci* **2021**, *30*  
1117 (1), 70-82.
- 1118 108. Jenik, M.; Parra, R. G.; Radusky, L. G.; Turjanski, A.; Wolynes, P. G.; Ferreira, D. U. Protein frustratometer:  
1119 a tool to localize energetic frustration in protein molecules. *Nucleic Acids Res* **2012**, *40* (Web Server issue),  
1120 W348-351.
- 1121 109. Parra, R. G.; Schafer, N. P.; Radusky, L. G.; Tsai, M. Y.; Guzovsky, A. B.; Wolynes, P. G.; Ferreira, D. U.  
1122 Protein Frustratometer 2: a tool to localize energetic frustration in protein molecules, now with  
1123 electrostatics. *Nucleic Acids Res* **2016**, *44* (W1), W356-360.
- 1124 110. Freiburger, M. I.; Wolynes, P. G.; Ferreira, D. U.; Fuxreiter, M. Frustration in Fuzzy Protein Complexes  
1125 Leads to Interaction Versatility. *J Phys Chem B* **2021**, *125* (10), 2513-2520.
- 1126 111. Gianni, S.; Freiburger, M. I.; Jemth, P.; Ferreira, D. U.; Wolynes, P. G.; Fuxreiter, M. Fuzziness and  
1127 Frustration in the Energy Landscape of Protein Folding, Function, and Assembly. *Acc Chem Res* **2021**, *54*  
1128 (5), 1251-1259.
- 1129 112. Guzovsky, A. B.; Schafer, N. P.; Wolynes, P. G.; Ferreira, D. U. Localization of Energetic Frustration in  
1130 Proteins. *Methods Mol Biol* **2022**, *2376*, 387-398.
- 1131 113. Hilser, V. J.; Wrabl, J. O.; Motlagh, H. N., Structural and energetic basis of allostery. *Annu Rev Biophys*  
1132 **2012**, *41*, 585-609.
- 1133 114. Motlagh, H. N.; Wrabl, J. O.; Li, J.; Hilser, V. J., The ensemble nature of allostery. *Nature* **2014**, *508*,  
1134 331-339.
- 1135 115. White, J.T.; Li, J.; Grasso, E.; Wrabl, J.O.; Hilser VJ. Ensemble allosteric model: energetic frustration  
1136 within the intrinsically disordered glucocorticoid receptor. *Philos Trans R Soc Lond B Biol Sci.* **2018**, *373*,  
1137 20170175.
- 1138 116. Li, J.; White, J.T.; Saavedra, H.; Wrabl, J.O.; Motlagh, H.N.; Liu, K.; Sowers, J.; Schroer, T.A.; Thompson,  
1139 E.B.; Hilser, V.J. Genetically tunable frustration controls allostery in an intrinsically disordered  
1140 transcription factor. *Elife* **2017**, *6*, e30688.
- 1141 117. Leander, M.; Yuan, Y.; Meger, A.; Cui, Q.; Raman, S. Functional plasticity and evolutionary  
1142 adaptation of allosteric regulation. *Proc. Natl. Acad. Sci. U. S. A.* **2020**, *117*, 25445-25454.
- 1143 118. Wolynes, P.G. Evolution, energy landscapes and the paradoxes of protein folding. *Biochimie.* **2015**, *119*,  
1144 218-230.
- 1145 119. Berman, H.M.; Westbrook, J.; Feng, Z.; Gilliland, G.; Bhat, T.N.; Weissig, H.; Shindyalov, I.N.; Bourne,  
1146 P.E. The Protein Data Bank. *Nucleic Acids Res.* **2000**, *28*, 235-242.
- 1147 120. Rose, P. W.; Prlic, A.; Altunkaya, A.; Bi, C.; Bradley, A. R.; Christie, C. H.; Costanzo, L. D.; Duarte, J. M.;  
1148 Dutta, S.; Feng, Z.; Green, R. K.; Goodsell, D. S.; Hudson, B.; Kalro, T.; Lowe, R.; Peisach, E.; Randle, C.;  
1149 Rose, A. S.; Shao, C.; Tao, Y. P.; Valasatava, Y.; Voigt, M.; Westbrook, J. D.; Woo, J.; Yang, H.; Young, J. Y.;  
1150 Zardecki, C.; Berman, H. M.; Burley, S. K. The RCSB protein data bank: integrative view of protein, gene  
1151 and 3D structural information. *Nucleic Acids Res.* **2017**, *45*, D271-D281.
- 1152 121. Hooft, R. W.; Sander, C.; Vriend, G. Positioning hydrogen atoms by optimizing hydrogen-bond networks  
1153 in protein structures. *Proteins* **1996**, *26*, 363-376.
- 1154 122. Hekkelman, M. L.; Te Beek, T. A.; Pettifer, S. R.; Thorne, D.; Attwood, T. K.; Vriend, G. WIWS: A protein  
1155 structure bioinformatics web service collection. *Nucleic Acids Res.* **2010**, *38*, W719-W723.
- 1156 123. Fiser, A.; Sali, A. ModLoop: Automated modeling of loops in protein structures. *Bioinformatics* **2003**, *19*,  
1157 2500-2501.
- 1158 124. Fernandez-Fuentes, N.; Zhai, J.; Fiser, A. ArchPRED: A template based loop structure prediction server.  
1159 *Nucleic Acids Res.* **2006**, *34*, W173-W176.
- 1160 125. Ko, J.; Lee, D.; Park, H.; Coutsias, E. A.; Lee, J.; Seok, C. The FALC-Loop web server for protein loop  
1161 modeling. *Nucleic Acids Res.* **2011**, *39*, W210-W214.
- 1162 126. Krivov, G. G.; Shapovalov, M. V.; Dunbrack, R. L., Jr. Improved prediction of protein side-chain  
1163 conformations with SCWRL4. *Proteins* **2009**, *77*, 778-795.

- 1164 127. Rotkiewicz, P.; Skolnick, J. Fast procedure for reconstruction of full-atom protein models from reduced  
1165 representations. *J. Comput. Chem.* **2008**, *29*, 1460-1465.
- 1166 128. Lombardi, L. E.; Marti, M. A.; Capece, L. CG2AA: backmapping protein coarse-grained structures.  
1167 *Bioinformatics* **2016**, *32*, 1235-1237.
- 1168 129. Bhattacharya, D.; Nowotny, J.; Cao, R.; Cheng, J. 3Drefine: an interactive web server for efficient protein  
1169 structure refinement. *Nucleic Acids Res.* **2016**, *44*, W406-W409.
- 1170 130. Watanabe, Y.; Berndsen, Z. T.; Raghvani, J.; Seabright, G. E.; Allen, J. D.; Pybus, O. G.; McLellan,  
1171 J. S.; Wilson, I. A.; Bowden, T. A.; Ward, A. B.; Crispin, M. Vulnerabilities in coronavirus glycan  
1172 shields despite extensive glycosylation. *Nat. Commun.* **2020**, *11*, 2688.
- 1173 131. Watanabe, Y.; Allen, J. D.; Wrapp, D.; McLellan, J. S.; Crispin, M. Site-specific glycan analysis of the  
1174 SARS-CoV-2 spike. *Science* **2020**, *369*, 330-333.
- 1175 132. Kolinski, A. Protein modeling and structure prediction with a reduced representation. *Acta Biochim. Pol.*  
1176 **2004**, *51*, 349-371.
- 1177 133. Kmiecik, S.; Gront, D.; Kolinski, M.; Wieteska, L.; Dawid, A.E.; Kolinski, A. Coarse-grained protein models  
1178 and their applications. *Chem. Rev.* **2016**, *116*, 7898-7936.
- 1179 134. Kmiecik, S.; Kouza, M.; Badaczewska-Dawid, A.E.; Kloczkowski, A.; Kolinski, A. Modeling of protein  
1180 structural flexibility and large-scale dynamics: Coarse-grained simulations and elastic network models.  
1181 *Int. J. Mol. Sci.* **2018**, *19*, e3496.
- 1182 135. Ciemny, M.P.; Badaczewska-Dawid, A.E.; Pikuzinska, M.; Kolinski, A.; Kmiecik, S. Modeling of  
1183 disordered protein structures using monte carlo simulations and knowledge-based statistical force fields.  
1184 *Int. J. Mol. Sci.* **2019**, *20*, e606.
- 1185 136. Kurcinski, M.; Oleniecki, T.; Ciemny, M.P.; Kuriata, A.; Kolinski, A.; Kmiecik, S. CABS-flex standalone: A  
1186 simulation environment for fast modeling of protein flexibility. *Bioinformatics* **2019**, *35*, 694-695.
- 1187 137. Jamroz, M.; Orozco, M.; Kolinski, A.; Kmiecik, S. Consistent view of protein fluctuations from all-atom  
1188 molecular dynamics and coarse-grained dynamics with knowledge-based force-field. *J. Chem. Theory*  
1189 *Comput.* **2013**, *9*, 119-125.
- 1190 138. Badaczewska-Dawid, A. E.; Kolinski, A.; Kmiecik, S. Protocols for fast simulations of protein structure  
1191 flexibility using CABS-Flex and SURPASS. *Methods Mol. Biol.* **2020**, *2165*, 337-353.
- 1192 139. Koukos, P.I.; Glykos, N.M. Grcarma: A fully automated task-oriented interface for the analysis of  
1193 molecular dynamics trajectories. *J. Comput. Chem.* **2013**, *34*, 2310-2312.
- 1194 140. Guerois, R.; Nielsen, J.E.; Serrano, L. Predicting Changes in the Stability of Proteins and Protein  
1195 Complexes: A Study of More than 1000 Mutations. *J. Mol. Biol.* **2002**, *320*, 369-387.
- 1196 141. Tokuriki, N.; Stricher, F.; Schymkowitz, J.; Serrano, L.; Tawfik, D.S. The Stability Effects of Protein  
1197 Mutations Appear to be Universally Distributed. *J. Mol. Biol.* **2007**, *369*, 1318-1332.
- 1198 142. Schymkowitz, J.; Borg, J.; Stricher, F.; Nys, R.; Rousseau, F.; Serrano, L. The FoldX Web Server: An Online  
1199 Force Field. *Nucleic Acids Res.* **2005**, *33*, W382-W388.
- 1200 143. Van Durme, J.; Delgado, J.; Stricher, F.; Serrano, L.; Schymkowitz, J.; Rousseau, F. A Graphical Interface for  
1201 the FoldX Force Field. *Bioinformatics* **2011**, *27*, 1711-1712.
- 1202 144. Christensen, N.J.; Kepp, K.P. Accurate Stabilities of Laccase Mutants Predicted With a Modified FoldX  
1203 Protocol. *J. Chem. Inf. Model.* **2012**, *52*, 3028-3042.
- 1204 145. Christensen, N.J.; Kepp, K.P. Stability Mechanisms of Laccase Isoforms Using a Modified FoldX Protocol  
1205 Applicable to Widely Different Proteins. *J. Chem. Theory Comput.* **2013**, *9*, 3210-3223.
- 1206 146. Dehouck, Y.; Kwasigroch, J. M.; Rooman, M.; Gilis, D. BeAtMuSiC: Prediction of changes in  
1207 protein-protein binding affinity on mutations. *Nucleic Acids Res.* **2013**, *41*, W333-W339.
- 1208 147. Dehouck, Y.; Gilis, D.; Rooman, M. A new generation of statistical potentials for proteins. *Biophys. J.* **2006**,  
1209 *90*, 4010-4017.
- 1210 148. Dehouck, Y.; Grosfils, A.; Folch, B.; Gilis, D.; Bogaerts, P.; Rooman, M. Fast and accurate predictions of  
1211 protein stability changes upon mutations using statistical potentials and neural networks: PoPMuSiC-2.0.  
1212 *Bioinformatics* **2009**, *25*, 2537-2543.
- 1213

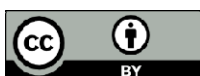

**S-G614**  
Closed state  
7KRQ

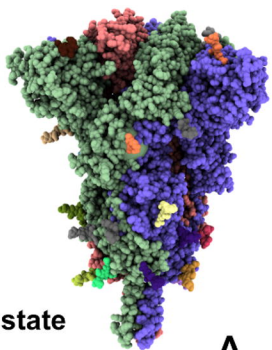

**A**

**S-B.1.1.7**  
Closed state  
7N1U

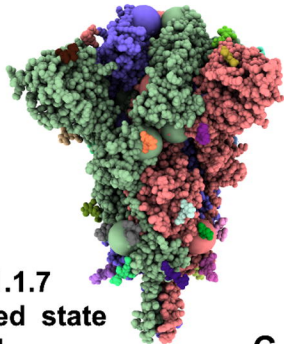

**C**

**S-B.1.351**  
Closed state  
7N1T

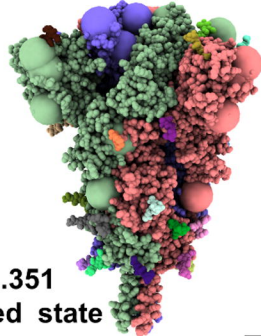

**E**

**S-G614**  
Open state  
7KRR

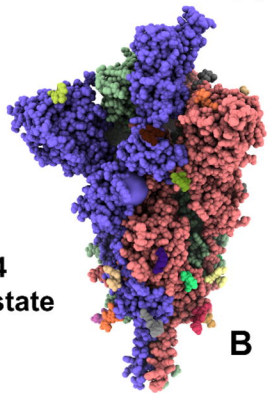

**B**

**S-B.1.1.7**  
Open state  
7N1V

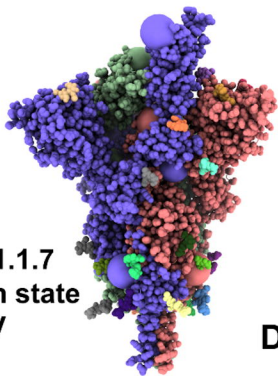

**D**

**S-B.1.351**  
Open state  
7N1Q

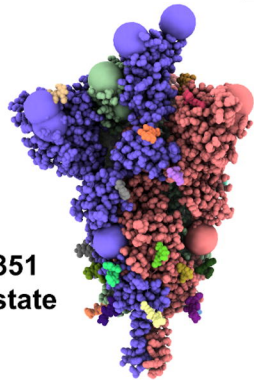

**F**

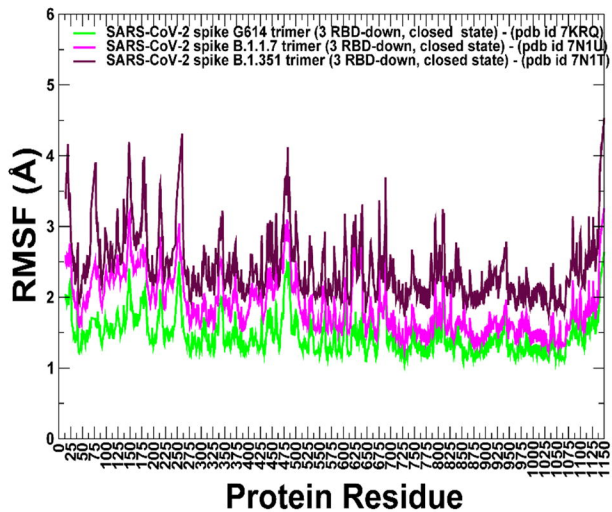

**A**

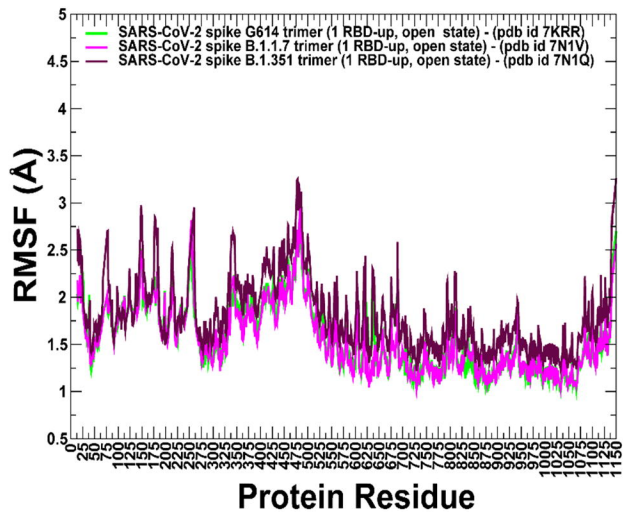

**B**



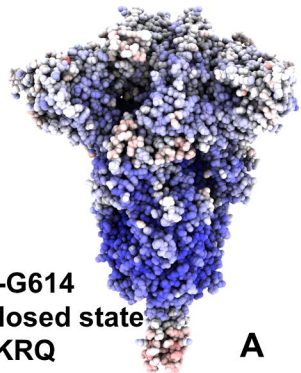

**A**

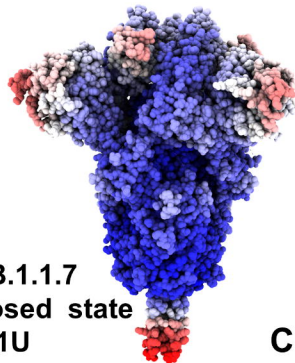

**C**

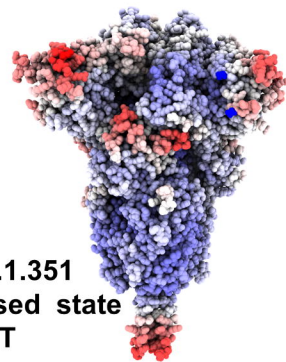

**E**

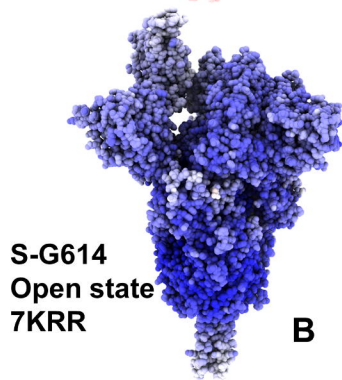

**B**

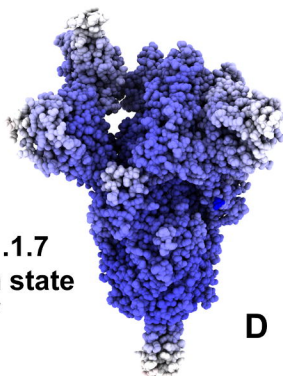

**D**

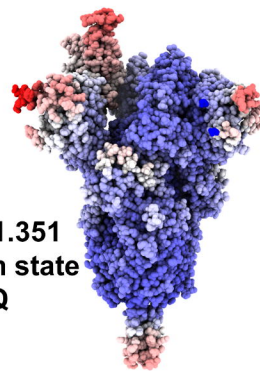

**F**

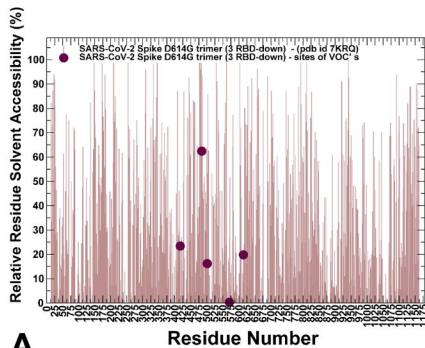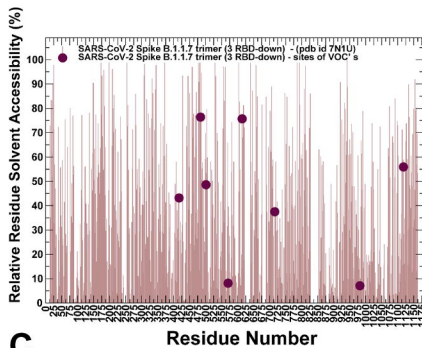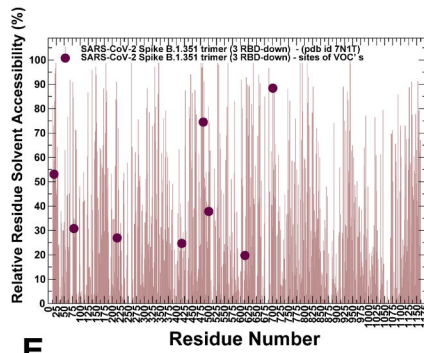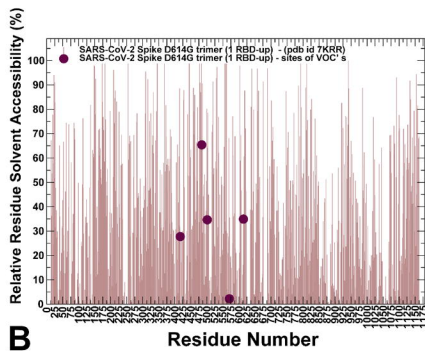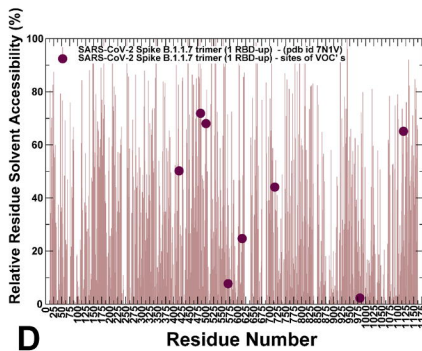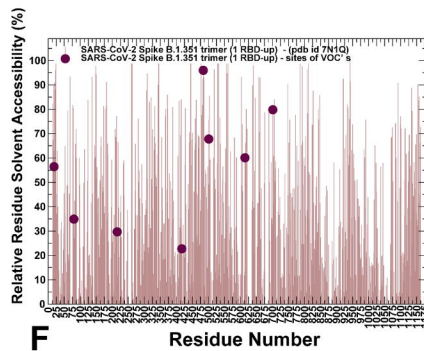

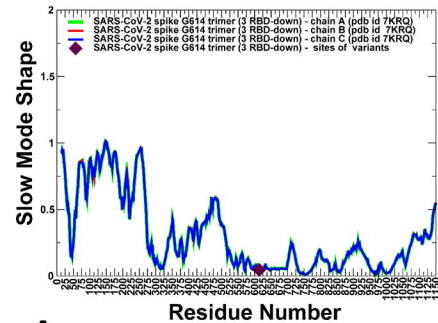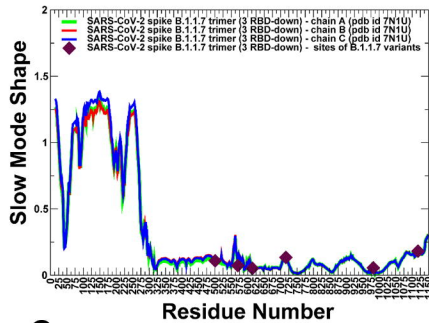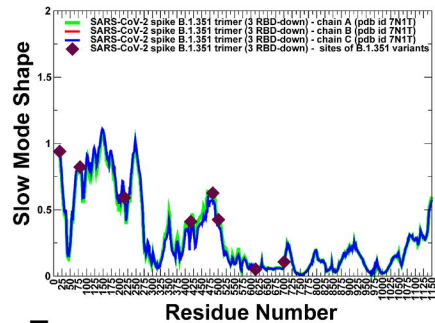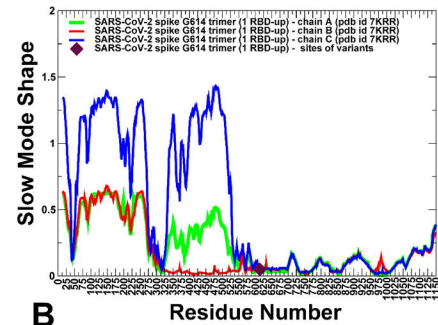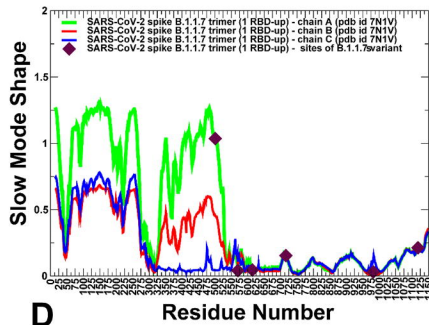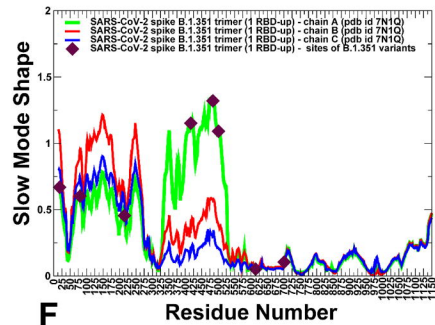

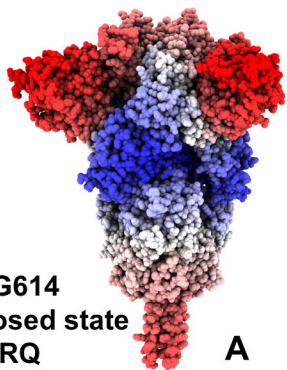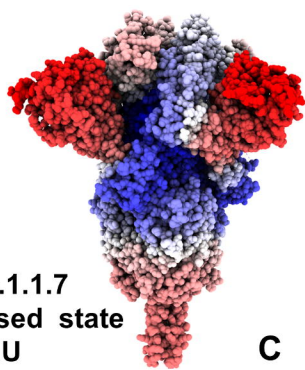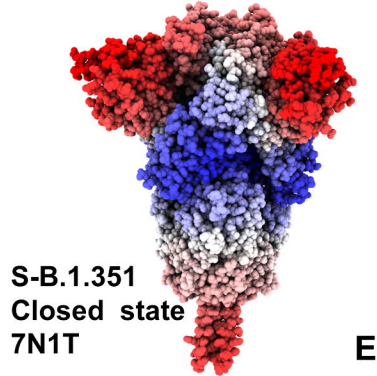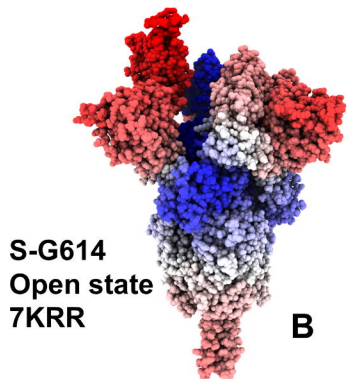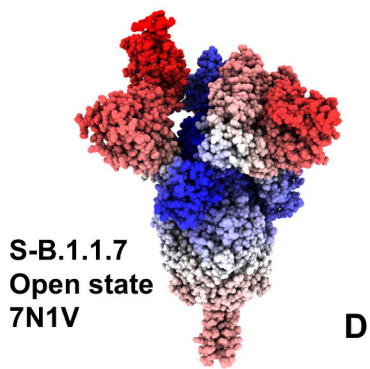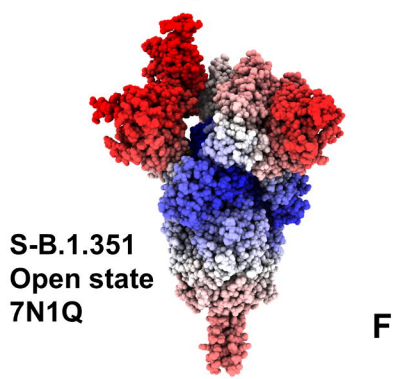

**A**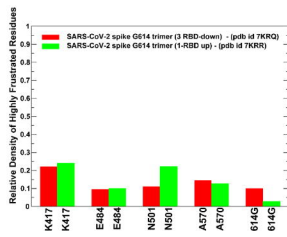**B**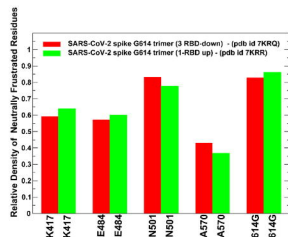**C**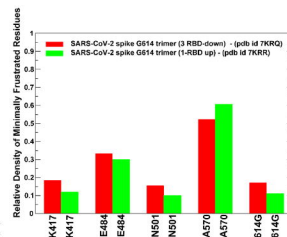**D**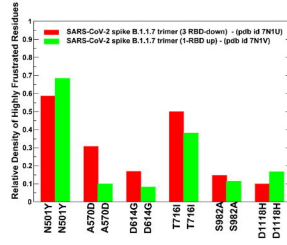**E**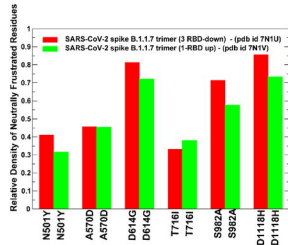**F**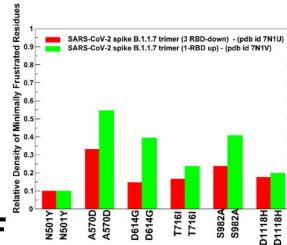**G**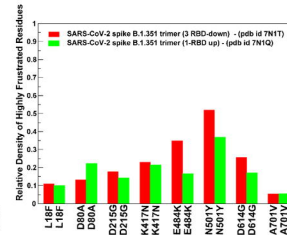**H**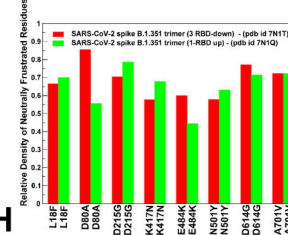**I**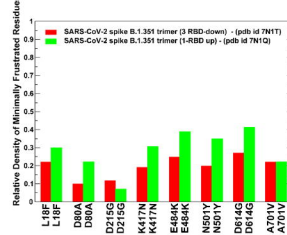

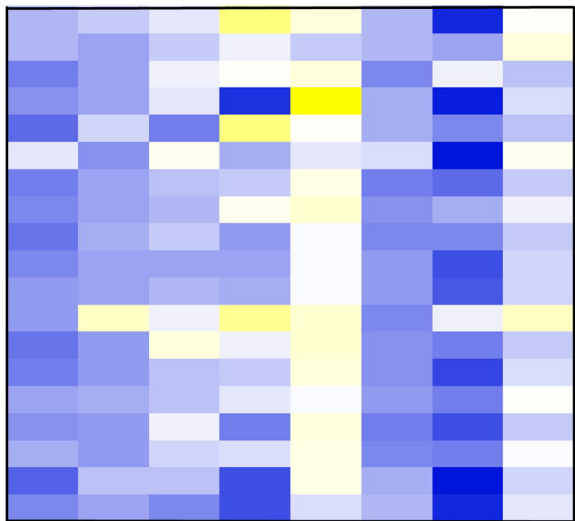

**S-B.1.1.7**  
**Closed state**  
**7N1U**

**A**

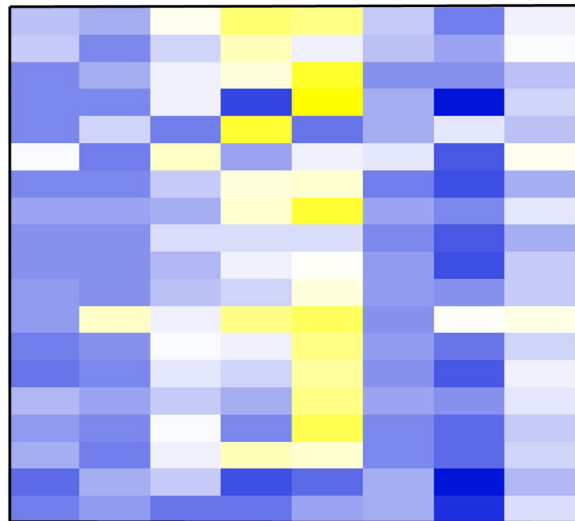

**S-B.1.1.7**  
**Open state**  
**7N1V**

**B**



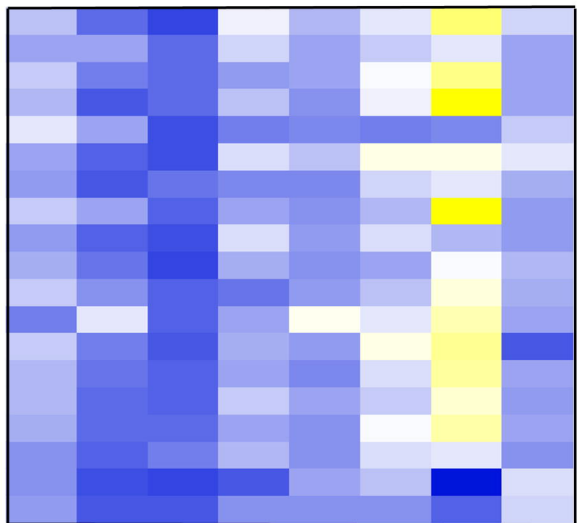

L18F D80A D215G K417N E484K N501Y D614G A701V

**S-B.1.351**  
**Closed state**  
**7N1T**

**A**

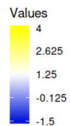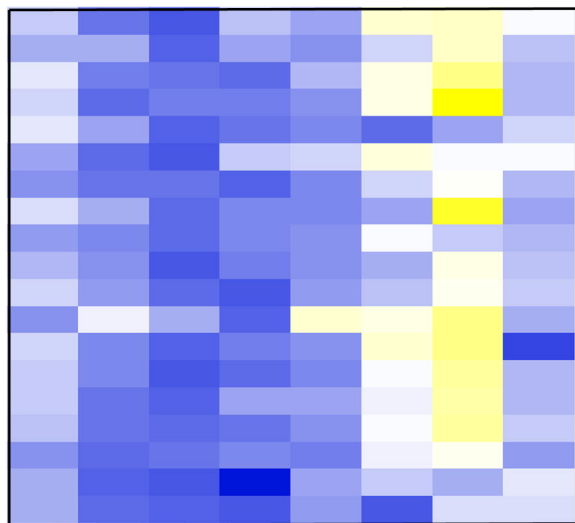

L18F D80A D215G K417N E484K N501Y D614G A701V

**S-B.1.351**  
**Open state**  
**7N1Q**

**B**

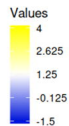

Source: https://www.biorxiv.org/content/10.1101/2021.12.22.473892v1.full.pdf
